# Supplementary material for: Digital Engagement Strategy and Health Care Worker Mental Health: A Randomized Clinical Trial
Source: PubMed Central journal article supplement (PMC11127125; doi:10.1001/jamanetworkopen.2024.10994), 2024-05-24
Supplement: jamanetwopen-e2410994-s001.pdf [file jamanetwopen-e2410994-s001.pdf]

1 **Supplement**

2 **Trial Protocol and Statistical Analysis Plan**

3 **Effect of a Digital Engagement Strategy on Healthcare Worker Mental Health and Well-being: A**  
4 **Randomized Controlled Trial**

5  
6 Anish K. Agarwal MD, MPH, MS; Lauren Southwick MPH; Rachel Gonzales MPH; Lisa Bellini MD; David A  
7 Asch MD, MBA; Judy Shea PhD; Nandita Mitra PhD; Lin Yang MS; Michael Josephs BS; Michael Kopinsky  
8 BS; Mohan Balachandran MA, MS; Courtney Wolk MD; Emily Becker-Haimes PhD; Raina M Merchant  
9 MD, MSHP

10 Page

---

11 Original protocol ..... 3

12 Final protocol ..... 20

13 Summary of protocol changes ..... 44

14 Original statistical analysis plan ..... 53

15 Final statistical analysis plan ..... 54

16 Summary of statistical analysis plan changes ..... 55

17

18  
  
19  
20  
21  
22  
23  
24  
25  
26  
27  
28  
29  
30  
31  
32  
33  
34  
35  
36  
37  
38  
39  
40  
41  
42  
43  
44  
45  
46  
47  
48  
49  
50  
51  
52  
53  
54  
55  
56  
57  
58  
59  
60  
61  
62  
63

Original Study Protocol

**Table of Contents**

|                                                 |    |
|-------------------------------------------------|----|
| <b>1. Abstract</b>                              | 3  |
| <b>2. Background</b>                            | 3  |
| <b>3. Overall Objectives</b>                    | 5  |
| 3.1. Primary Aims                               | 5  |
| 3.2. Secondary Aims                             | 5  |
| <b>4. Primary Outcome Variable</b>              | 5  |
| <b>5. Secondary Outcome Variable(s)</b>         | 5  |
| <b>6. Study Design</b>                          | 5  |
| 6.1. Phase                                      | 5  |
| 6.2. Design                                     | 6  |
| 6.3. Study Duration                             | 7  |
| 6.4. Facilities                                 | 7  |
| 6.5. Key Inclusion Criteria                     | 7  |
| 6.6. Key Exclusion Criteria                     | 8  |
| <b>7. Subject Recruitment</b>                   | 8  |
| 7.1. Target Population                          | 8  |
| 7.2. Subjects at Penn                           | 8  |
| 7.3. Accrual                                    | 8  |
| 7.4. Patient Subject Recruitment                | 8  |
| 7.5. Subject Compensation                       | 9  |
| <b>8. Study Procedures</b>                      | 9  |
| 8.1. Consent Process                            | 9  |
| 8.1.1. Waiver of Alteration of Informed Consent | 10 |
| 8.1.2. Minimal Risk                             | 10 |
| 8.1.3. Impact on Subject Rights and Welfare     | 10 |
| 8.1.4. Waiver Essential to Research             | 11 |
| 8.1.5. Written Statement of Research            | 11 |
| 8.2. Procedures                                 | 11 |
| <b>9. Analysis Plan</b>                         | 11 |
| <b>10. Subject Confidentiality</b>              | 12 |
| 10.1. Subject Privacy                           | 13 |
| 10.2. Data Disclosure                           | 13 |
| 10.3. Data confidentiality                      | 13 |
| <b>11. Consent Process Overview</b>             | 14 |
| 11.1. Potential Study Risks                     | 14 |
| 11.2. Potential Study Benefits                  | 14 |
| 11.3. Alternatives to Participation             | 15 |
| 11.4. Data Safety and Monitoring                | 15 |

64 **1. Abstract**

65 Early in the pandemic, our team developed and implemented Penn Cobalt across the University of  
66 Pennsylvania Health System which spans six acute-care hospitals and employs over 43,000 individuals.  
67 Cobalt is a web-based platform that curates mental health and wellness content and provides  
68 connection to group and individual support. Using validated mental health assessments, Cobalt triages  
69 users to the right level and type of support across three categories: In the studio synchronous group  
70 sessions, On your time asynchronous content, and 1:1 support. The 1:1 support represents a stepped  
71 care model of mental health services and includes peer support, resilience coaches offering  
72 psychological first aid, psychotherapists, and psychiatrists. Cobalt's embedded scheduling and telehealth  
73 capabilities also provide HIPAA-compliant mental health care in a convenient, patient-centered model.  
74 Cobalt content continuously adapts and evolves through crowdsourced feedback to encompass locally  
75 defined and sensitive resources (e.g. addressing racial trauma). Over the first 7 months, Cobalt has had  
76 over 140,000-page views and 18,300 unique users engaging with its content and support. The platform  
77 identified 111 HCWs reporting thoughts of self-harm and connected those individuals with a mental  
78 health provider for support and evaluation within 24 hours.

79  
80 **1. Background**

81 Epidemics are often associated with significant mental health consequences to society. Large-scale  
82 disasters, whether traumatic (e.g., the World Trade Center attacks or mass shootings), natural (e.g.,  
83 hurricanes), or environmental (e.g., Deepwater Horizon oil spill), are often accompanied by increases in  
84 depression, posttraumatic stress disorder (PTSD), substance use disorder, and a broad range of other  
85 mental health and behavioral disorders, domestic violence, and child abuse. For example, prior work  
86 showed that 5% of the population affected by Hurricane Ike in 2008 met the criteria for major  
87 depressive disorder in the month after the hurricane; 1 out of 10 adults in New York City showed signs  
88 of the disorder in the month following the 9/11 attacks. And almost 25% of New Yorkers reported  
89 increased alcohol use after the tragic attacks. Communities affected by the Deepwater Horizon oil spill  
90 showed signs of clinically significant depression and anxiety. The SARS epidemic was also associated with  
91 increases in PTSD, stress, and psychological distress in patients and clinicians. For such events, the  
92 impact on mental health can occur in the immediate aftermath and then persist over long time periods.  
93 The rates of stress and burnout were high in health care workers prior to the pandemic and those rates  
94 have persisted or increased. In March of 2020, COVID-19 emerged as a global pandemic resulting in  
95 acute stressors directly impacting an already vulnerable and strained health care system. Healthcare  
96 workers (HCWs) are facing unique challenges during the COVID-19 pandemic related to rapid shifts in  
97 care, strains on availability of personal protective equipment, moral injury, and concerns about risks of  
98 infection. The challenges confronting HCWs continue outside of work including childcare responsibilities,  
99 career trajectory and concern for employment status with dynamically shifting practice models and  
100 patient volumes. The mental health burdens of frontline HCWs began to emerge in early retrospective  
101 studies from China and Italy; with early reports of increases in clinician suicide due to the pandemic.  
102 HCWs are predicted to face repeated acute triggering events throughout the long period of  
103 disillusionment we now find ourselves in as we slowly inch towards reconstruction and recovery with  
104 the COVID-19 pandemic. Additional HCW stress is associated with the real or perceived risk of  
105 contracting COVID-19 or spreading it to loved ones. A 2020 MMWR report on occupation type and job  
106 setting of HCWs with COVID-19 showed that the relative percentage of cases was high in nurses (1742,  
107 29.5%), environmental services (EVS) (330, 5.6%), physicians (190,3.2), and respiratory therapists (44,  
108 0.7%). COVID-19 has also affected HCWs across demographics with higher rates of death in  
109 underrepresented minorities. Among HCW with COVID-19 the median age was 41 years and 79% were  
110 females. For the 69,678 (69%) of cases with available data on race and ethnicity the distribution was  
111 Whites (47%), Blacks (26%), Hispanics (12%) Asians (9%). Compared with COVID-19 survivors, non-

## Effect of a Digital Engagement Strategy on Healthcare Worker Mental Health and Well-being: A Randomized Controlled Trial

112 survivors were more likely to be older (median age 62), male (38% vs. 22%), Asian (20% vs. 9%), or Black  
113 (32% versus 25%). The increased exposure to COVID-19 may also limit physical contact of HCW with  
114 usual support networks and systems (e.g. family or faith-based groups) or lead to increased stress  
115 because of home based caregiving for elderly or immunocompromised family members. HCWs  
116 identifying as Black, indigenous, or of color are a vulnerable population. Prior reports support that black  
117 adults are approximately 10% more likely to report psychological distress when compared with white  
118 adults. Data from the Health and Human Services Office of Minority Health also shows that black adults  
119 are more likely than white adults to report hopelessness, sadness, and feeling like everything is an  
120 effort. There are significant barriers to accessing mental health care for black adults and it is estimated  
121 that only one in three black adults who need mental health care receive it. Many reasons contribute to  
122 these disparities including: costs of care, stigma associated with care, provider bias, lack of knowledge  
123 regarding available mental health therapies, and the lack of minority mental health professionals. For  
124 those who do receive care, the care is often of lower quality and not culturally aligned. Black HCWs have  
125 historically been subject to racism, discrimination, and inequity--and the national events centered  
126 around racial injustice coupled with COVID-19 have likely exacerbated mental health and well-being in  
127 measurable and sustained ways. Minority HCWs were already strained, often working within settings  
128 where they themselves are subject to microaggressions, overt acts of racism, structural racism and are  
129 direct observers of racial inequities in patient care leading to significant disparities in morbidity and  
130 mortality. Racial minorities are also disproportionately in jobs with high exposure risk including grocery  
131 stores, public transportation, factories, and health care facilities. A meta-analysis of 293 studies  
132 identified that racism significantly contributed to worse mental and physical health. Based on findings  
133 from more than 60 structured interviews with Black HCWs, the noted sociologist Adia Wingfield  
134 summarized her findings and noted: being a Black health care worker comes with specific difficulties  
135 that can easily go unnoticed. In a pandemic where Black populations are among the hardest hit, these  
136 difficulties are likely being magnified exponentially. Health care systems are undoubtedly taxed, but in  
137 the interest of their workers, they should consider ways they can support Black health care providers to  
138 offset the kinds of burnout and stresses research indicates they are likely experiencing right now. In this  
139 national emergency, health care systems may need to think past providing health care just for patients  
140 and consider the health of their workers, perhaps through counseling and support groups, heeding  
141 employees suggestions for how systems can be improved. The social and economic consequences of  
142 COVID-19 are predicted to affect women differently than men. Prior reports support that women have  
143 been more likely to lose their jobs or leave them during the pandemic due to a need to provide child and  
144 elder care as well as to support home schooling. While this unpaid labor has increased, paid work  
145 opportunities have also decreased for women. Increases in sexual and physical violence toward women  
146 during lockdowns have also been reported. The United Nations has identified increased vulnerability of  
147 female frontline workers and the need for targeted programs to specifically address their unique mental  
148 health needs due to a multitude of stressors. Prior reports have also focused on female frontline  
149 providers and physician researchers and threats to their professional careers, particularly academic,  
150 advancement due to barriers in work productivity as a result of COVID-19. The psychological impact of  
151 the delay in academic career progression (e.g. fewer grant submissions, fewer peer-reviewed  
152 publications, fewer leadership opportunities) could be pronounced and long standing. Considering how  
153 the pandemic has led to considerable strain on women and the unique impact on women in health care,  
154 this proposal specifically focuses on evaluating if Cobalt+ will have a greater impact on women and can  
155 serve as a platform for addressing inequities in mental health care for this vulnerable population.  
156 COVID-19 has increased the use and application of digital technologies in health care including text  
157 messaging, mobile surveys, and telemedicine. Evolving and rapidly adopted approaches in mobile  
158 engagement through digital technology create scalable opportunities to assess individuals needs in real-  
159 time and can be used to rapidly deploy tailored well-being and mental health interventions. This

160 approach also offers a strategy to reveal the central tendencies, distributions, and associations which, in  
161 population-based studies, can immediately inform a health systems approach toward maintaining a  
162 healthy workforce and lowering barriers to mental health care.

163  
164 **2. Overall Objectives**

165 Through a RCT, evaluate the effectiveness of Cobalt+ on HCW depression/anxiety (primary outcome)  
166 compared with Cobalt (usual care).

167  
168 *2.1. Primary Aims*

169 Aim 1: Through a RCT, evaluate the effectiveness of Cobalt+ on HCW depression/anxiety (primary  
170 outcome) compared with Cobalt (usual care).

171  
172 Aim 2: To better understand perceptions of access to mental health care and the effectiveness of  
173 Cobalt compared with Cobalt+ among HCWs through semi-structured qualitative interviews.

174  
175 *2.2. Secondary Aims*

176 Secondary outcomes will include well-being, satisfaction with access to care, and measures of work  
177 productivity. HTE will be explored for race and gender.

178  
179 **3. Primary Outcome Variable**

180 Measures were selected based on clinical relevance, validity in the HCW population, and meaningfulness  
181 to the target population. To facilitate data sharing, measures below were also identified to align with the  
182 NIMH data archive when possible Depression and Anxiety: The primary outcome will be depression and  
183 anxiety as measured by the Patient Health Questionnaire (PHQ-9) and General Anxiety Disorder (GAD-7)  
184 respectively. PHQ-9 and GAD-7 have been validated and used in multiple studies and provide easy, simple  
185 scales to quickly assess for depression and anxiety. PHQ9 is a 9-item score which ranges from 0 (least  
186 depressed) to 27 (most depressed. GAD-7 is a 7- item scale which assess the frequency of anxiety  
187 symptoms over the past two weeks on a 4-point Likert-scale ranging from 0 (never) to 3 (nearly every  
188 day). The total score of GAD-7 ranged from 0 to 21, with increasing scores indicating more severe  
189 functional impairments as a result of anxiety.

190  
191 **4. Secondary Outcome Variable(s)**

192 Well-being index: The Well-being index (WBI) is a nine-question survey validated for use in HCW  
193 populations and considered important to health systems in managing the well-being of their workforce.  
194 Work productivity: To evaluate work productivity, we will use the World Health Organization Health and  
195 Work Performance Questionnaire (HPQ) short form. The HPQ is a validated self-report instrument  
196 designed to estimate the workplace costs of health problems with regard to reduced job performance,  
197 absence due to sickness, and work-related injuries and accidents. We will administer the short form  
198 which is an 11-question survey focused on absenteeism and presenteeism. Satisfaction with care: Client  
199 Satisfaction with Care (CSQ)-8 is a brief 8-item unidimensional well-established scale for assessing  
200 patients satisfaction with overall outpatient health care. It has been shown to be reliable and valid in  
201 assessing care across a range of settings.

202  
203 **5. Study Design**

204 *5.1. Phase*  
205 Not applicable

206

207        5.2. *Design*

208 We will conduct a prospective two-armed randomized control trial to test the effect of tailored mental  
209 health support on self-reported HCW mental health (anxiety and depression) during the response and  
210 recovery phases of the COVID-19 pandemic. The control group will have access to Cobalt which is usual  
211 care for all Penn Medicine employees. The Cobalt platform is web-based and is accessible from any  
212 device or desktop. Cobalt uses contextual surveys and evidence-based assessments to triage individual  
213 users to curated content and appropriate group or individual support. The current, and usual care,  
214 model is a digital version of what exists at other institutions where resources are available for staff to  
215 access wellness and mental health services. The usual care Cobalt model requires staff to personally  
216 initiate multiple steps: 1) identify a personal need for support, 2) know where to seek support and care,  
217 3) schedule an appointment, and 4) attend the appointment. In this context, the individual has to pull  
218 the resources they need and there may be several barriers to completing each step. This is particularly  
219 relevant as mental health conditions can compromise insight, motivation, and decision making, thereby  
220 making self-directed engagement in care (pull) more challenging. The study will be single-blinded and  
221 the study biostatistician will determine when to unblind the study. Given that the study compares the  
222 same process delivered as either a pull (usual care = Cobalt) or a push (intervention = Cobalt +) we  
223 believe risk is low. Nevertheless, we will engage a 3-member independent Data and Safety Monitoring  
224 Board to oversee the trial. In accordance with conventional practices, we will not identify members in  
225 advance so as not to disqualify potential proposal reviewers. To assess factors that may contribute  
226 toward accessing and using mental health resources between Cobalt versus Cobalt+, we will conduct  
227 semi-structured interviews (telephone or virtual video conference) with HCWs enrolled in Aim 1.  
228 Standardized interview guides will be created using the consolidated framework for implementation  
229 research (see Appendix) to ensure uniformity in how and what questions are asked of each group. Some  
230 questions within the guides will be the same between those in the traditional care arm (Cobalt) versus  
231 intervention (Cobalt+) to allow for comparison. We will interview up to 80 HCWs from Penn Medicine in  
232 order to understand the attitudes and decision-making involved in mental health strain during COVID-  
233 19. We will recruit across both arms of the Aim 1 study to investigate HCW in usual care Cobalt (n=40)  
234 and from those in the intervention arm Cobalt+ (n=40). Using data from Aim 1, we will use a deviance  
235 sampling approach to identify HCW from the top and bottom 25% percentiles of anxiety and depression  
236 scales. This deviant selection is intentional to maximize the potential to identify themes unique to high  
237 or low levels of mental health strain. Individual scale scoring will not be revealed in order to limit  
238 responder bias, increase response rates and avoid attribution bias. We will recruit HCWs using a series  
239 of e-mails (up to 4 email invitations) and text messages (up to 3 text invitations). We will contact  
240 participants to obtain consent, ensure study procedures are described, answer questions and offer a \$50  
241 gift card for their time. The goal is to conduct 80 audio-recorded semi-structured interviews (~20-30  
242 minutes). Interview questions will be aligned with themes from our preliminary studies and focus groups  
243 with front line healthcare workers early in the pandemic. Participants will be contacted one month  
244 following the end of the Aim 1 intervention period and consented via WTH. Participants will not be  
245 informed as to why they were selected and confidentiality will be maintained. There is variability in how  
246 individuals experience anxiety, depression, stress and overall well-being. Understanding how HCWs  
247 think about these emotions, their physical and mental states of being, and the decisions to access and  
248 utilize mental health resources are essential to the design of interventions to facilitate and support the  
249 workforce. Understanding how HCWs approach mental health assessments for themselves and the  
250 stigma associated with care is also critical in designing programs that are acceptable and used.  
251 Investigation of the factors that impact mental health care in HCWs can be supported by semi-

## Effect of a Digital Engagement Strategy on Healthcare Worker Mental Health and Well-being: A Randomized Controlled Trial

252 structured interviews which ask open-ended questions and allow participants to describe key attitudes,  
253 decision-making processes, and emotions that are otherwise difficult to assess.

254

### 255 *5.3. Study Duration*

256 The RCT will compare this pull model with a new model, the intervention named Cobalt+, which will  
257 proactively reach out to and engage individuals in order to reduce barriers in identifying a need for and  
258 accessing mental health care. The intervention group will have access to the same Cobalt resources as  
259 those in the usual care group but will also receive a comprehensive suite of services including: 1)  
260 monthly automated text messaging reminders and links to Cobalt resources 2) intermittent mental  
261 health assessments (PHQ-9, GAD-7) at enrollment, month 2, month 4 and month 6 which triage  
262 individuals to an opt-out appointment with a resilience coach, psychotherapist, or psychiatrist based on  
263 their results. Of note, all employees will have access to Cobalt whether they are in the study or not.  
264 Through the proposed RCT we will evaluate whether the intervention, a proactive model of care delivery  
265 (Cobalt+) impacts the primary outcome measure (depression and anxiety) and secondary outcome  
266 measures (well-being, satisfaction with access to care, and measures of work productivity [e.g.  
267 absenteeism]).

268

### 269 *5.4. Facilities*

270 The research team is highly experienced and well-positioned to execute this project rapidly and across  
271 departments and hospitals within Penn Medicine. Team members have worked closely on many clinical  
272 and research programs, conducted clinical trials using mobile and digital tools and platforms, and  
273 conducted trials specifically in the target vulnerable population, HCW. Pilot work from this team has led  
274 to multiple peer-reviewed publications in wellbeing, mental health, and deploying digital tools and  
275 platforms. We have enthusiastic support from Penn Medicine and departmental leadership in  
276 developing strategies to identify, support, and protect HCW well-being and mental health. Our team is  
277 interwoven within the frontline clinical workforce. The research team brings together expertise in real-  
278 time patient- centered engagement using digital tools (Merchant, Agarwal, Asch), digital health  
279 (Merchant, Agarwal), well-being research (Bellini, Asch, Agarwal, Wolk), survey and qualitative methods  
280 (Shea), advanced biostatistics and computational methods (Mitra) and innovations in health systems  
281 (Asch, Merchant, Agarwal). Our team also has integral roles in Penn Medicine leadership which can help  
282 with project stewardship and uptake: PI (Merchant) serves as the Penn Medicine Associate Vice  
283 President of Digital Health, Co-I (Bellini) is the Senior Vice Dean for Academic Affairs and health system  
284 lead for Cobalt, and Co-I (Asch) is the Executive Director of the Penn Medicine Center for Health Care  
285 Innovation and Innovation lead for Cobalt. Additionally, Penn is an opportune venue to conduct COVID-  
286 19 related research as a leader in the region in acute and virtual care during the pandemic. This proposal  
287 represents a natural next step to build upon our expertise and track record of success in designing,  
288 conducting, and disseminating meaningful and actionable patient and provider centered research.  
289 Advisory Board and stakeholder engagement: To insure input from providers that will inform the  
290 research, we will convene an advisory board representing entities from each (n=12) of the direct patient  
291 care groups (e.g. physicians, nurses, certified nursing assistants, lab technicians, radiology technicians  
292 physical therapists, occupational therapists, pharmacists, pharmacy technicians, patient registration  
293 staff, patient intake coordinators, environmental service personnel). We have strong existing  
294 relationships with these groups and will meet with them before the study initiates and then every 6  
295 months thereafter for input, engagement, and feedback. Some of the members of this group will also be  
296 recruitment champions identified. This step is critically important and we will work collaboratively with  
297 this group for stakeholder guidance about all aspects of execution and reporting for the study.

298

### 299 *5.5. Key Inclusion Criteria*

300 There are no inclusion and exclusion criteria for any subpopulation based on race/ethnicity, age, gender,  
301 status as a vulnerable population. Eligibility criteria for study enrollment will include: 1) age 18 years or  
302 older; 2) regular, daily access to a smartphone 3) able to communicate fluently in English (as the current  
303 Cobalt assessments and resources are in English at this time), 4) work at least 4 hours per week in either  
304 a hospital or outpatient based settings (e.g. physicians, nurses, certified nursing assistants, lab  
305 technicians, radiology technicians, physical therapist, occupational therapist, pharmacists, pharmacy  
306 technicians, patient registration staff, receptionists/patient intake coordinators, environmental service  
307 personnel) approximately 4 hours/week (on average 192 hours/ 48 weeks in a year) in the study time  
308 frame. Eligible participants will then have an opportunity to consent to study participation. Any HCW  
309 meeting these criteria will be eligible to participate in the research; we will not exclude any potential  
310 participant based on a priori criteria.

311  
312 *5.6. Key Exclusion Criteria*

313 1). Under 18 years of age; 2) does not have an interest in participating in a 9-month study and willing to  
314 complete regular surveys; 3) does not have regular, daily access to an SMS-capable phone 4) unable to  
315 communicate fluently in English (as the current Cobalt assessments and resources are in English at this  
316 time), 5) does not provide direct patient care approximately 4 hours/week (on average 192 hours/ 48  
317 weeks in a year) in the study time frame. 6). Not willing to provide informed consent

318  
319 **6. Subject Recruitment**

320 *6.1. Target Population*

321 The population of interest for this proposal is HCWs who in the midst of COVID-19 are at increased risk  
322 for mental health symptoms and conditions. We will also utilize University groups and motivated mental  
323 healthcare champions to specifically promote inclusion of female and underrepresented minority HCW  
324 in the RCT and qualitative aim. This focus aligns with the RFA which identifies vulnerable populations as:  
325 medical personnel with direct patient care and NIH-designated health disparity racial/ ethnic minorities.  
326 We specifically include a broad definition of HCWs (e.g. physicians, nurses, certified nursing assistants,  
327 lab technicians, radiology technicians, physical therapists, occupational therapists, pharmacists,  
328 pharmacy technicians, patient registration staff, coroners, receptionists/patient intake coordinators,  
329 environmental service personnel) that are not routinely evaluated jointly and with the same  
330 intervention. While much of the attention in the pandemic has been on physicians and nurses we aim to  
331 focus on a broader group that is at risk for COVID-19 and mental health symptoms and conditions

332 *6.2. Subjects at Penn*

333 1,250

334  
335 *6.3. Accrual*

336 To recruit potential study participants, we will send an email about the study to the entire Penn  
337 Medicine employee listserv, as these individuals are the same recipients of Penn Medicine news and  
338 Covid-19 updates who have received prior information about the availability of Cobalt. Emails will be  
339 sent up to 5 times to this employee list. The plan to outreach to employees in this manner has been  
340 approved by both Penn Medicine Human Resources and the Penn Medicine Chief Operation Officer. We  
341 will specifically engage recruitment champions in the study design and for support in extending the  
342 reach of the recruitment email to underrepresented minority HCWs. These recruitment champions will  
343 include each Departments Vice Chair for Diversity and Inclusion to support sending the email about the  
344 study to their Departments and groups within their Departments specifically focused on diversity and  
345 inclusion. We will also engage Centers, Departments, and Groups at Penn Medicine to support  
346 dissemination of the study announcement. These include the Office of Inclusion and Diversity, the  
347 Alliance of Minority Physicians, Penn Medicine Center for Health Equity Advancement, Bold Solutions



348 Initiative, FOCUS on health and leadership for women, Penn Promotes research on sex and gender in  
349 health, and the Program for Health Equity in Education and Research. Furthermore, we will recruit in-  
350 person across the Penn Medicine campus such as tabling outside of prominent buildings and  
351 departments (New Pavilion and cafeterias) and attend department morning huddles / meetings to  
352 accommodate staff members who have limited access to their email accounts. We will also be  
353 intentional about diversity of representation in the images in all study materials and highlight the  
354 diversity in our project team. We base our power considerations on baseline data presented in an RCT  
355 conducted by Graham et al. In their study, they report a mean baseline PHQ-9 of 14.0 (SE=5.0) and mean  
356 GAD-7 of 11.6 (SE=4.6). We assume a type I error rate of 2.5% (.05/2) to account for the two separate  
357 outcomes that we will be evaluating. We aim to enroll 1250 participants with the anticipation that there  
358 will be 20% attrition.

359

#### 360 *6.4. Patient Subject Recruitment*

361 To recruit potential study participants, we will send an email about the study to the entire Penn  
362 Medicine employee listserv, as these individuals are the same recipients of Penn Medicine news and  
363 Covid-19 updates who have received prior information about the availability of Cobalt. Emails will be  
364 sent up to 5 times to this employee list. The plan to outreach to employees in this manner has been  
365 approved by both Penn Medicine Human Resources and the Penn Medicine Chief Operation Officer (see  
366 letters of support). Exploratory Aim1 specifically seeks to determine if the effect of the intervention  
367 varies across patient subgroups (e.g. race and gender) as we recognize the importance of evaluating the  
368 effect of Cobalt in these specific populations. We will specifically engage recruitment champions in the  
369 study design and for support in extending the reach of the recruitment email to underrepresented  
370 minority HCWs. These recruitment champions will include each Departments Vice Chair for Diversity and  
371 Inclusion to support sending the email about the study to their Departments and groups within their  
372 Departments specifically focused on diversity and inclusion. We will also engage Centers, Departments,  
373 and Groups at Penn Medicine to support dissemination of the study announcement. These include the  
374 Office of Inclusion and Diversity, the Alliance of Minority Physicians, Penn Medicine Center for Health  
375 Equity Advancement, Bold Solutions Initiative, FOCUS on health and leadership for women, Penn  
376 Promotes research on sex and gender in health, and the Program for Health Equity in Education and  
377 Research. We will also be intentional about diversity of representation in the images in all study  
378 materials and highlight the diversity in our project team. To promote retention, participants will be  
379 emailed up to 4 times and texted (up to three times) to nudge survey and assessment completion. For  
380 compensation, each participant will receive up to \$200: \$50 at enrollment, \$75 at 6 months and \$75 at 9  
381 months for 3 total surveys. Submission for subject reimbursement will occur immediately upon  
382 completion of surveys and assessments and occur through the Way to Health platform which facilitates  
383 timely payment.

384

#### 385 *6.5. Subject Compensation*

386 To promote retention, participants will be emailed up to 4 times and texted (up to three times) to nudge  
387 survey and assessment completion. For compensation, each participant will receive up to \$200: \$50 at  
388 enrollment, \$75 at 6 months and \$75 at 9 months for 3 total surveys. Submission for subject  
389 reimbursement will occur immediately upon completion of surveys and assessments and occur through  
390 the Way to Health platform which facilitates timely payment. Each participant will receive \$50 for  
391 interview completion.

392

## 393 **7. Study Procedures**

394 *7.1. Consent Process*

Effect of a Digital Engagement Strategy on Healthcare Worker Mental Health and Well-being: A Randomized Controlled Trial

395 To recruit potential study participants, we will send an email about the study to the entire Penn  
396 Medicine employee listserv, these individuals are the same recipients of Penn Medicine news and  
397 COVID-19 updates who have received prior information about the availability of Cobalt. Emails will be  
398 sent up to 4 times to this employee list. This proposal includes a letter of support from the Penn  
399 Medicine Director of Human Resources and Penn Medicine Chief Operation Officer indicating support  
400 for the project and access to these listservs. Participants will provide electronic informed consent before  
401 participation in the study. The electronic consent form is hosted on Way to Health, HIPAA Compliant  
402 Platform. Participants will be notified that enrollment is voluntary and declining to participate will not  
403 change their access to Cobalt or have an impact on their employment. Participants will be consented  
404 with ample time to discuss consent. Participants will be given contact information (including telephone  
405 and email) for the principal investigator (Dr. Merchant), and the University of Pennsylvania IRB to  
406 address any potential concerns. A detailed Manual of Operations will be developed for the study and  
407 procedures will be designed to ensure efficient and prompt updating. Our project is designed to function  
408 entirely remotely (recruitment, consent, enrollment, survey completion) All study participants read and  
409 review the informed consent document independently on Way to Health but research team members  
410 are readily available to discuss the form and answer questions via email or telephone communications,  
411 all noted on the instructions of the informed consent document on Way to Health. All investigators have  
412 experience in developing a manual of operations. All study staff will undergo a thorough training and  
413 certification procedure prior to protocol implementation, including CITI Course in the Protection of  
414 Human Research Participants online training in research ethics. The initial training will be conducted by  
415 the PI and will include an overview of the study, detailed explanation of the study protocol, and hands-  
416 on practice of specific protocol components. All study staff will be observed conducting randomly  
417 selected protocol duties at least twice annually and evaluated using specifically designed checklists.

418  
419 *7.1.1.1. Waiver or Alteration of Informed Consent*

420 Not applicable

421  
422 *7.1.1.2. Minimal Risk*

423 Since we are recruiting Penn Medicine employees, the informed consent highlights how their Penn  
424 Medicine employer, director, supervisor, or co-worker may be an investigator in this research study. The  
425 document also includes language on how if the individual chooses not to participate, there will be no  
426 loss of benefits to which they are otherwise entitled. Their employment is not in jeopardy based on their  
427 enrollment status. Given that the study compares the same process delivered as either a pull (usual care  
428 = Cobalt) or a push (intervention = Cobalt +) we believe risk is low. Nevertheless, we will engage a 3-  
429 member independent Data and Safety Monitoring Board to oversee the trial. In accordance with  
430 conventional practices, we will not identify members in advance so as not to disqualify potential  
431 proposal reviewers. All subjects will be consented for participation and will have the ability to withdraw  
432 at any time. There is minimal risk to the participants as Penn Cobalt will triage patients accordingly to  
433 level of services for mental health support. All qualitative results will be de-identified and any collected  
434 PHI data will be stored securely and separately. Participants can elect to not participate in the study  
435 without any consequences. Participants can also opt-out of participating at any time. All employees have  
436 access to Cobalt and associated services; participants in the intervention arm may be less likely to  
437 experience risks associated with the research because they are receiving pushed services designed to  
438 reduce barriers to access of mental health services.

439 *7.1.1.3. Impact on Subject Rights and Welfare*

440 We will be obtaining informed consent from patients who have been provided a thorough explanation  
441 of the study and the opportunity to ask any questions about study participation. Patients will be read  
442 the entire consent and given the option to participate.

443  
444  
445  
446  
447  
448  
449  
450  
451  
452  
453  
454  
455  
456  
457  
458  
459  
460  
461  
462  
463  
464  
465  
466  
467  
468  
469  
470  
471  
472  
473  
474  
475

7.1.1.4. *Waiver Essential to Research*

All participants will be recruited through remote procedures.

7.1.1.5. *Written Statement of Research*

This study does not operate under a written statement of research.

7.2. *Procedures*

We will conduct a prospective two-armed randomized control trial to test the effect of tailored mental health support on self-reported HCW mental health (anxiety and depression) during the response and recovery phases of the COVID-19 pandemic. The control group will have access to Cobalt which is usual care for all Penn Medicine employees. The Cobalt platform is web-based and is accessible from any device or desktop. Cobalt uses contextual surveys and evidence-based assessments to triage individual users to curated content and appropriate group or individual support. The current, and usual care, model is a digital version of what exists at other institutions where resources are available for staff to access wellness and mental health services. The usual care Cobalt model requires staff to personally initiate multiple steps: 1) identify a personal need for support, 2) know where to seek support and care, 3) schedule an appointment, and 4) attend the appointment. In this context, the individual has to pull the resources they need and there may be several barriers to completing each step. This is particularly relevant as mental health conditions can compromise insight, motivation, and decision making, thereby making self-directed engagement in care (pull) more challenging. The RCT will compare this pull model with a new model, the intervention named Cobalt+, which will proactively reach out to and engage individuals in order to reduce barriers in identifying a need for and accessing mental health care. The intervention group will have access to the same Cobalt resources as those in the usual care group but will also receive a comprehensive suite of services including: 1) monthly automated text messaging reminders and links to Cobalt resources 2) intermittent mental health assessments (PHQ-9, GAD-7) at enrollment, month 2, month 4 and month 6 which triage individuals to an opt-out appointment with a resilience coach, psychotherapist, or psychiatrist based on their results. Of note, all employees will have access to Cobalt whether they are in the study or not. Through the proposed RCT we will evaluate whether the intervention, a proactive model of care delivery (Cobalt+) impacts the primary outcome measure (depression and anxiety) and secondary outcome measures (well-being, satisfaction with access to care, and measures of work productivity [e.g. absenteeism]).

**8. Analysis Plan**

We will conduct an intent to treat (ITT) analysis. The ITT analysis will include all randomized participants in the groups to which they were randomly assigned. Baseline demographic and clinical characteristics will be reported as frequency and percent for categorical variables and median and distribution for continuous variables. We will compare baseline characteristics between intervention and control arms using t-tests for continuous variables and chi-squared tests for categorical variables. The goal of these comparisons will be to determine if the two arms are balanced on baseline variables after randomization. Our primary analysis will focus on the difference in PHQ-9 and GAD-7 scores at 6 months between the two arms. We will estimate and test differences in means between arms using two-sample t-tests and generalized linear models that account for baseline measurements of PHQ-9 and GAD-7. Missing data will be assessed for patterns and multiple imputation will be used if deemed appropriate. Baseline covariates that are found to be imbalanced between arms may be adjusted for in the model if they were deemed to be potential confounders a priori to adjust for potential confounding and for efficiency gain. We will use all available PHQ-9 and GAD-7 scores on eligible patients from randomization

491 through the last observation. A  $p < 0.05$  will be deemed statistically significant but emphasis will be placed  
492 on point estimates and confidence intervals. Secondary outcomes of mental healthcare utilization,  
493 satisfaction with connection to services, and qualitative feedback on mobile engagement will also be  
494 modeled using GEE with mean models specified based on the distribution of the specific outcome (e.g.  
495 Poisson or negative binomial for number of mental healthcare visits, logit for binary responses).  
496 Potential associations between system-level or regional level case burden and PHQ-9 and GAD-7 scores  
497 at baseline and over-time will be assessed with generalized linear models and GEE. Exploratory Aim 1:  
498 Statistical approach: The statistical approach for studying HTE will be to test for the statistical  
499 interaction between the intervention and race and separately by gender in the GEE models described  
500 above. Although our study was not designed specifically to detect HTE, if 20% of our trial participants  
501 are Black (based on targeted recruitment efforts), our study will achieve 80% power (assuming type I  
502 error of 0.05) to detect a 1.8 difference in mean GAD-7 scores and a 2.0 difference in mean PHQ-9  
503 scores between arms at 6 months. We anticipate that at least 50% of participants will be female. Hence,  
504 our study is powered to detect a 1.2 difference in mean GAD-7 scores and a 1.3 difference in mean PHQ-  
505 9 scores between arms at 6 months among women.  
506

507 Aim 2: Power: no power calculation will be performed for this qualitative aim consistent with prior  
508 qualitative aims we will aim to interview 80 participants from Aim 1 and evaluate themes until  
509 saturation Analysis: Using thematic analysis, we will analyze HCW interview transcripts to identify  
510 recurring themes in attitudes and beliefs toward mental health, well-being, and mental health care or  
511 resources. Interview audio will be transcribed and uploaded into NVivo software (available as a Penn  
512 resource). In total we plan for up to 80 semi-structured interviews, or until inductive thematic saturation  
513 is reached in each group meaning no new themes are emerging. Analysis of qualitative, semi-structured  
514 interviews utilizes a series of systematic steps in transcribing, developing a code for thematic content,  
515 and subsequent coding of interviews. A modified grounded theory approach will be used to evaluate  
516 interview transcriptions. Analysis will begin shortly after the first few interviews are completed. An  
517 emergent, iterative open coding process will be followed and two trained coders from the research  
518 team will jointly read five transcripts and draft the outline of a codebook. Each coder will then  
519 independently code five more transcripts and adjust the codebook as needed. We will review the codes,  
520 resolve discrepancies and finalize coding procedures. Following adjudication of any areas of discrepancy,  
521 the research team coders will be assigned batches of transcripts for independent coding, sharing 25% of  
522 the transcripts in each batch for ongoing inter-rater agreement assessment. We will review coding for  
523 interrater reliability, measured by Cohens kappa (0.8), and overall comprehensiveness. If a high kappa is  
524 not achieved, further double coding and refining of the code will continue. This approach to coding and  
525 analyzing qualitative data has been widely used. Strategies used to ensure reliability and validity in the  
526 qualitative data will include a comprehensive audit trail, checks between coders, team debriefing, and  
527 corroboration of findings across participants.

## 528 **9. Subject Confidentiality**

529 The research team will exercise extreme caution with identifiable private information. Patients  
530 randomized to the intervention arm will receive weekly messages from Way to Health. In the patients  
531 informed consent, they are instructed and agree by signing the document that they will not disclose  
532 personal health information (PHI) on the Way to Health texting platform and only respond to the text  
533 message prompts. When patient participants (both control and intervention) text into the Way to Health  
534 or complete a survey, the research team will receive email notification immediately. The research team  
535 is instructed to review the message within 1-4 hours of delivery, Monday through Friday, 8 am to 5pm.  
536 The line will be closed on Saturday and Sunday however patient participants will receive an out of office

Effect of a Digital Engagement Strategy on Healthcare Worker Mental Health and Well-being: A  
Randomized Controlled Trial

537 message if they text in; the messages notes, Thank you for reaching out, we will get back to you when  
538 we get back in the office! and a Patient Inquiry Incident is created. An exception to confidentiality is if  
539 significant suicidal ideation, is exhibited through text message or via PHQ-9. Question 9 asks about  
540 thoughts of being better off dead or of hurting oneself in some way over the last two weeks with an  
541 associated scale delineating not at all, several days, more than half the days, or nearly every day. Those  
542 indicating any response beyond not at all will be triaged to immediate access to a therapist via the  
543 Cobalt platform. This is the current standard of care and will be the same for both Cobalt and Cobalt  
544 plus in this trial.

545 *10.1 Subject Privacy*

546 Privacy refers to the person's desire to control access of others to themselves. Privacy concerns people,  
547 whereas confidentiality concerns data. Describe the strategies to protect privacy giving consideration to  
548 the following: The degree to which privacy can be expected in the proposed research and the safeguards  
549 that will be put into place to respect those boundaries. The methods used to identify and contact  
550 potential participants. The settings in which an individual will be interacting with an investigator. The  
551 privacy guidelines developed by relevant professions, professional associations and scholarly disciplines  
552 (e.g., psychiatry, genetic counseling, oral history, anthropology, psychology). Interview audio-recordings  
553 will be transcribed verbatim and all identifiers will be removed. The recording and transcript will be kept  
554 a secure and locked area with access limited to designated researchers. After we analyze the recordings,  
555 we will destroy recordings after data analysis or completion of the study. All encounters will take place  
556 online via BlueJeans or Way to Health, HIPAA compliant platform.

557 *10.2 Data Disclosure*

558 Survey data will be submitted to the National Institute of Mental Health Data Archive (NDA) at the  
559 National Institutes of Health (NIH). NDA is a large database where deidentified study data from many  
560 NIH studies are stored and managed. De-identified study data means that all personal information (such  
561 as name, address, birthdate and phone number) is removed and replaced with a code number. PHI will  
562 not be shared with anyone outside the parameters of the study as detailed in the Consent/HIPAA  
563 process.

564 *10.3 Data confidentiality*

565 The following methods will be employed to protect patient PHI for this research study:

566 x Computer-based files will only be made available to personnel involved in the study through the use of  
567 access privileges and passwords.

568 x Prior to access to any study-related information, personnel will be required to sign statements  
569 agreeing to protect the security and confidentiality of identifiable information.

570 x Wherever feasible, identifiers will be removed from study-related information.

571 x A Certificate of Confidentiality will be obtained, because the research could place the subject at risk of  
572 criminal or civil liability or cause damage to the subject's financial standing, employability, or liability.

## Effect of a Digital Engagement Strategy on Healthcare Worker Mental Health and Well-being: A Randomized Controlled Trial

573 x Precautions are in place to ensure the data is secure by using passwords and encryption, because the  
574 research involves web-based surveys.

575 x Audio and/or video recordings will be transcribed and then destroyed to eliminate audible  
576 identification of subjects.

### 577 **11 Consent Process Overview**

578 Participants will enroll in this study via a remote recruitment process. The study coordinator will review  
579 the consent script, which will include a description of the voluntary nature of participation, the study  
580 procedures, risks and potential benefits in detail. Participants will be told that all information will be  
581 kept strictly confidential, except as required by law. Subjects will be provided a copy of the consent  
582 document. All efforts will be made by study staff to ensure subject privacy. Enrollment will be conducted  
583 by the study coordinators who will enter patient information directly into the Way to Health platform  
584 once a participant has consented to participate.

#### 585 **11.2 Potential Study Risks**

586 Given that the study compares the same process delivered as either a pull (usual care = Cobalt) or a  
587 push (intervention = Cobalt +) we believe risk is low. Nevertheless, we will engage a 3-member  
588 independent Data and Safety Monitoring Board to oversee the trial. In accordance with conventional  
589 practices, we will not identify members in advance so as not to disqualify potential proposal reviewers.  
590 All subjects will be consented for participation and will have the ability to withdraw at any time. There is  
591 minimal risk to the participants as Penn Cobalt will triage patients accordingly to level of services for  
592 mental health support. All qualitative results will be de-identified and any collected PHI data will be  
593 stored securely and separately. Participants can elect to not participate in the study without any  
594 consequences. Participants can also opt-out of participating at any time. All employees have access to  
595 Cobalt and associated services; participants in the intervention arm may be less likely to experience risks  
596 associated with the research because they are receiving pushed services designed to reduce barriers to  
597 access of mental health services..

#### 598 **11.3 Potential Study Benefits**

599 All participants will have access to Cobalt, digital mental health and well-being platform which provides  
600 stepped care based on needs. Additionally, participants using either Cobalt or Cobalt+ may identify  
601 depression or anxiety otherwise unknown to them and then will be connected to care. The direct  
602 benefit to human subjects is in the use of Cobalt (usual care) and for those who are in the Cobalt+  
603 intervention arm, access to a pushed model of care where resources are opt-out. The information  
604 learned from this study will hopefully help contribute to the fields of digital health and mental health.  
605 The risks are reasonable in relation to the importance of knowledge expected to be gained. Information  
606 learned from this study could improve our understanding of how digital platforms can be used to  
607 engage participants, measure mental health using validated scales, and connection individuals to  
608 resources and care. We will also gain insights about how these platforms impact access to care and  
609 perceived barriers to care in healthcare workers. Ultimately, the data can be used to better understand  
610 and improve strategies for protecting and supporting the mental health of healthcare workers  
611 throughout the COVID-19 pandemic and its associated phases, but also in the future.

612            *11.4 Alternatives to Participation*

613            Not participate in the study. As a reminder, all Penn Medicine and University of Pennsylvania have  
614            access to Cobalt resources, regardless of their participation in the study.

615            *11.5 Data and Safety Monitoring*  
616

617            The study will be single-blinded and the study biostatistician will determine when to unblind the study.  
618            Given that the study compares the same process delivered as either a pull (usual care = Cobalt) or a  
619            push (intervention = Cobalt +) we believe risk is low. Nevertheless we will engage a 3-member  
620            independent Data and Safety Monitoring Board to oversee the trial. In accordance with conventional  
621            practices, we will not identify members in advance so as not to disqualify potential proposal reviewers.  
622            Given that the study compares the same process delivered as either a pull (usual care) or a push  
623            (intervention = well-being platform) we believe risk is low. Nevertheless, we will engage a 3-member  
624            independent Data and Safety Monitoring Board to oversee the trial. In accordance with conventional  
625            practices, we will not identify members in advance so as not to disqualify potential proposal reviewers.  
626            These three external investigators will have expertise in mental health and wellness, employee health,  
627            and digital health. In accordance with conventional practices, we will not identify members in advance  
628            so as not to disqualify potential proposal reviewers. The responsibilities of the DSMB will include:  
629            Reviewing the research protocol, consent, and plans for DSMB Evaluate the progress of the trial:  
630            recruitment, retention, data quality, and adverse events Protection of participant safety Ensure high  
631            standards for privacy and no breach of data security Provide written summary reports to the PI  
632            (Merchant) and investigators after convening Provide a written summary report to the NIH funding body  
633            if required This study will not have pre-specified stopping rules. The study will be single-blinded and the  
634            study biostatistician will determine when to unblind the study..

635  
636  
637  
638

Effect of a Digital Engagement Strategy on Healthcare Worker Mental Health and Well-being: A  
Randomized Controlled Trial

|     |        |                                               |    |
|-----|--------|-----------------------------------------------|----|
| 639 |        | <u>Final Study Protocol</u>                   |    |
| 640 | 1.     | <b>Abstract</b> .....                         | 17 |
| 641 | 2.     | <b>Background</b> .....                       | 17 |
| 642 | 3.     | <b>Overall Objectives</b> .....               | 19 |
| 643 | 3.1.   | Primary Aims.....                             | 19 |
| 644 | 3.2.   | Secondary Aims.....                           | 19 |
| 645 | 4.     | <b>Primary Outcome Variable</b> .....         | 19 |
| 646 | 5.     | <b>Secondary Outcome Variable(s)</b> .....    | 19 |
| 647 | 6.     | <b>Study Design</b> .....                     | 20 |
| 648 | 6.1.   | Phase.....                                    | 20 |
| 649 | 6.2.   | Design.....                                   | 20 |
| 650 | 6.3.   | Study Duration.....                           | 21 |
| 651 | 6.4.   | Facilities.....                               | 22 |
| 652 | 6.5.   | Key Inclusion Criteria.....                   | 22 |
| 653 | 6.6.   | Key Exclusion Criteria.....                   | 22 |
| 654 | 7.     | <b>Subject Recruitment</b> .....              | 23 |
| 655 | 7.1.   | Target Population.....                        | 23 |
| 656 | 7.2.   | Subjects at Penn.....                         | 23 |
| 657 | 7.3.   | Accrual.....                                  | 23 |
| 658 | 7.4.   | Patient Subject Recruitment.....              | 24 |
| 659 | 7.5.   | Subject Compensation.....                     | 25 |
| 660 | 8.     | <b>Study Procedures</b> .....                 | 25 |
| 661 | 8.1.   | Consent Process.....                          | 25 |
| 662 | 8.1.1. | Waiver of Alteration of Informed Consent..... | 25 |
| 663 | 8.1.2. | Minimal Risk.....                             | 25 |
| 664 | 8.1.3. | Impact on Subject Rights and Welfare.....     | 26 |
| 665 | 8.1.4. | Waiver Essential to Research.....             | 26 |
| 666 | 8.1.5. | Written Statement of Research.....            | 26 |
| 667 | 8.2.   | Procedures.....                               | 26 |
| 668 | 9.     | <b>Analysis Plan</b> .....                    | 26 |
| 669 | 10.    | <b>Subject Confidentiality</b> .....          | 27 |
| 670 | 10.1.  | Subject Privacy.....                          | 27 |
| 671 | 10.2.  | Data Disclosure .....                         | 28 |
| 672 | 10.3.  | Data confidentiality.....                     | 28 |
| 673 | 11.    | <b>Consent Process Overview</b> .....         | 29 |
| 674 | 11.1.  | Potential Study Risks.....                    | 29 |
| 675 | 11.2.  | Potential Study Benefits.....                 | 29 |
| 676 | 11.3.  | Alternatives to Participation.....            | 30 |
| 677 | 11.4.  | Data Safety and Monitoring .....              | 30 |
| 678 |        |                                               |    |
| 679 |        |                                               |    |
| 680 |        |                                               |    |
| 681 |        |                                               |    |
| 682 |        |                                               |    |
| 683 |        |                                               |    |
| 684 |        |                                               |    |
| 685 |        |                                               |    |
| 686 |        |                                               |    |



687 **1. Abstract**

688 Early in the pandemic, our team developed and implemented Penn Cobalt across the University of  
689 Pennsylvania Health System which spans six acute-care hospitals and employs over 43,000 individuals.  
690 Cobalt is a web-based platform that curates mental health and wellness content and provides  
691 connection to group and individual support. Using validated mental health assessments, Cobalt triages  
692 users to the right level and type of support across three categories: In the studio synchronous group  
693 sessions, On your time asynchronous content, and 1:1 support. The 1:1 support represents a stepped  
694 care model of mental health services and includes peer support, resilience coaches offering  
695 psychological first aid, psychotherapists and psychiatrists. Cobalts embedded scheduling and telehealth  
696 capabilities also provide HIPAA-compliant mental health care in a convenient, patient-centered model.  
697 Cobalt content continuously adapts and evolves through crowdsourced feedback to encompass locally  
698 defined and sensitive resources (e.g. addressing racial trauma). Over the first 7 months, Cobalt has had  
699 over 140,000-page views and 18,300 unique users engaging with its content and support. The platform  
700 identified 111 HCWs reporting thoughts of self-harm and connected those individuals with a mental  
701 health provider for support and evaluation within 24 hours.

702  
703 **2. Background**

704 Epidemics are often associated with significant mental health consequences to society. Large-scale  
705 disasters, whether traumatic (e.g., the World Trade Center attacks or mass shootings), natural (e.g.,  
706 hurricanes), or environmental (e.g., Deepwater Horizon oil spill), are often accompanied by increases in  
707 depression, posttraumatic stress disorder (PTSD), substance use disorder, and a broad range of other  
708 mental health and behavioral disorders, domestic violence, and child abuse. For example, prior work  
709 showed that 5% of the population affected by Hurricane Ike in 2008 met the criteria for major  
710 depressive disorder in the month after the hurricane; 1 out of 10 adults in New York City showed signs  
711 of the disorder in the month following the 9/11 attacks. And almost 25% of New Yorkers reported  
712 increased alcohol use after the tragic attacks. Communities affected by the Deepwater Horizon oil spill  
713 showed signs of clinically significant depression and anxiety. The SARS epidemic was also associated with  
714 increases in PTSD, stress, and psychological distress in patients and clinicians. For such events, the  
715 impact on mental health can occur in the immediate aftermath and then persist over long time periods.  
716 The rates of stress and burnout were high in health care workers prior to the pandemic and those rates  
717 have persisted or increased. In March of 2020, COVID-19 emerged as a global pandemic resulting in  
718 acute stressors directly impacting an already vulnerable and strained health care system. Healthcare  
719 workers (HCWs) are facing unique challenges during the COVID-19 pandemic related to rapid shifts in  
720 care, strains on availability of personal protective equipment, moral injury, and concerns about risks of  
721 infection. The challenges confronting HCWs continue outside of work including childcare responsibilities,  
722 career trajectory and concern for employment status with dynamically shifting practice models and  
723 patient volumes. The mental health burdens of frontline HCWs began to emerge in early retrospective  
724 studies from China and Italy; with early reports of increases in clinician suicide due to the pandemic.  
725 HCWs are predicted to face repeated acute triggering events throughout the long period of  
726 disillusionment we now find ourselves in as we slowly inch towards reconstruction and recovery with  
727 the COVID-19 pandemic. Additional HCW stress is associated with the real or perceived risk of  
728 contracting COVID-19 or spreading it to loved ones. A 2020 MMWR report on occupation type and job  
729 setting of HCWs with COVID-19 showed that the relative percentage of cases was high in nurses (1742,  
730 29.5%), environmental services (EVS) (330, 5.6%), physicians (190,3.2), and respiratory therapists (44,  
731 0.7%). COVID-19 has also affected HCWs across demographics with higher rates of death in  
732 underrepresented minorities. Among HCW with COVID-19 the median age was 41 years and 79% were  
733 females. For the 69,678 (69%) of cases with available data on race and ethnicity the distribution was  
734 Whites (47%), Blacks (26%), Hispanics (12%) Asians (9%). Compared with COVID-19 survivors, non-

## Effect of a Digital Engagement Strategy on Healthcare Worker Mental Health and Well-being: A Randomized Controlled Trial

735 survivors were more likely to be older (median age 62), male (38% vs. 22%), Asian (20% vs. 9%), or Black  
736 (32% versus 25%). The increased exposure to COVID-19 may also limit physical contact of HCW with  
737 usual support networks and systems (e.g. family or faith-based groups) or lead to increased stress  
738 because of home based caregiving for elderly or immunocompromised family members. HCWs  
739 identifying as Black, indigenous, or of color are a vulnerable population. Prior reports support that black  
740 adults are approximately 10% more likely to report psychological distress when compared with white  
741 adults. Data from the Health and Human Services Office of Minority Health also shows that black adults  
742 are more likely than white adults to report hopelessness, sadness, and feeling like everything is an  
743 effort. There are significant barriers to accessing mental health care for black adults and it is estimated  
744 that only one in three black adults who need mental health care receive it. Many reasons contribute to  
745 these disparities including: costs of care, stigma associated with care, provider bias, lack of knowledge  
746 regarding available mental health therapies, and the lack of minority mental health professionals. For  
747 those who do receive care, the care is often of lower quality and not culturally aligned. Black HCWs have  
748 historically been subject to racism, discrimination, and inequity--and the national events centered  
749 around racial injustice coupled with COVID-19 have likely exacerbated mental health and well-being in  
750 measurable and sustained ways. Minority HCWs were already strained, often working within settings  
751 where they themselves are subject to microaggressions, overt acts of racism, structural racism and are  
752 direct observers of racial inequities in patient care leading to significant disparities in morbidity and  
753 mortality. Racial minorities are also disproportionately in jobs with high exposure risk including grocery  
754 stores, public transportation, factories, and health care facilities. A meta-analysis of 293 studies  
755 identified that racism significantly contributed to worse mental and physical health. Based on findings  
756 from more than 60 structured interviews with Black HCWs, the noted sociologist Adia Wingfield  
757 summarized her findings and noted: being a Black health care worker comes with specific difficulties  
758 that can easily go unnoticed. In a pandemic where Black populations are among the hardest hit, these  
759 difficulties are likely being magnified exponentially. Health care systems are undoubtedly taxed, but in  
760 the interest of their workers, they should consider ways they can support Black health care providers to  
761 offset the kinds of burnout and stresses research indicates they are likely experiencing right now. In this  
762 national emergency, health care systems may need to think past providing health care just for patients  
763 and consider the health of their workers, perhaps through counseling and support groups, heeding  
764 employees suggestions for how systems can be improved. The social and economic consequences of  
765 COVID-19 are predicted to affect women differently than men. Prior reports support that women have  
766 been more likely to lose their jobs or leave them during the pandemic due to a need to provide child and  
767 elder care as well as to support home schooling. While this unpaid labor has increased, paid work  
768 opportunities have also decreased for women. Increases in sexual and physical violence toward women  
769 during lockdowns have also been reported. The United Nations has identified increased vulnerability of  
770 female frontline workers and the need for targeted programs to specifically address their unique mental  
771 health needs due to a multitude of stressors. Prior reports have also focused on female frontline  
772 providers and physician researchers and threats to their professional careers, particularly academic,  
773 advancement due to barriers in work productivity as a result of COVID-19. The psychological impact of  
774 the delay in academic career progression (e.g. fewer grant submissions, fewer peer-reviewed  
775 publications, fewer leadership opportunities) could be pronounced and long standing. Considering how  
776 the pandemic has led to considerable strain on women and the unique impact on women in health care,  
777 this proposal specifically focuses on evaluating if Cobalt+ will have a greater impact on women and can  
778 serve as a platform for addressing inequities in mental health care for this vulnerable population.  
779 COVID-19 has increased the use and application of digital technologies in health care including text  
780 messaging, mobile surveys, and telemedicine. Evolving and rapidly adopted approaches in mobile  
781 engagement through digital technology create scalable opportunities to assess individuals needs in real-  
782 time and can be used to rapidly deploy tailored well-being and mental health interventions. This

783 approach also offers a strategy to reveal the central tendencies, distributions, and associations which, in  
784 population-based studies, can immediately inform a health systems approach toward maintaining a  
785 healthy workforce and lowering barriers to mental health care.

### 786 **3. Overall Objectives**

787 Through a RCT, evaluate the effectiveness of Cobalt+ on HCW depression/anxiety (primary outcome)  
788 compared with Cobalt (usual care). *Aims*

#### 789 *3.1 Primary Aims*

790 Aim 1: Through a RCT, evaluate the effectiveness of Cobalt+ on HCW depression/anxiety (primary  
791 outcome) compared with Cobalt (usual care).

792 Aim 2: To better understand perceptions of access to mental health care and the effectiveness of  
793 Cobalt compared with Cobalt+ among HCWs through semi-structured qualitative interviews.

#### 794 *3.2 Secondary Aims*

795 Secondary outcomes will include well-being, satisfaction with access to care, and measures of work  
796 productivity. HTE will be explored for race and gender.

797

### 798 **4. Primary Outcome Variable**

799 Measures were selected based on clinical relevance, validity in the HCW population, and meaningfulness to  
800 the target population. To facilitate data sharing, measures below were also identified to align with the NIMH  
801 data archive when possible. The primary outcome will be depression and anxiety as measured by the Patient  
802 Health Questionnaire (PHQ-9) and General Anxiety Disorder (GAD-7) respectively. PHQ-9 and GAD-7 have  
803 been validated and used in multiple studies and provide easy, simple scales to quickly assess for depression  
804 and anxiety. PHQ-9 is a 9-item score which ranges from 0 (least depressed) to 27 (most depressed). GAD-7 is a  
805 7-item scale which assesses the frequency of anxiety symptoms over the past two weeks on a 4-point Likert-  
806 scale ranging from 0 (never) to 3 (nearly every day). The total score of GAD-7 ranged from 0 to 21, with  
807 increasing scores indicating more severe functional impairments as a result of anxiety.

808

### 809 **5. Secondary Outcome Variable(s)**

810 Well-being index: The Well-being index (WBI) is a nine-question survey validated for use in HCW populations  
811 and considered important to health systems in managing the well-being of their workforce.

812 The World Health Organization- Five Well-Being Index (WHO-5) is a short self-reported measure of current  
813 mental wellbeing. The WHO-5 has been found to have adequate validity in screening for depression and in  
814 measuring outcomes in clinical trials. Item response theory analyses in studies of younger persons and  
815 elderly persons indicate that the measure has good construct validity as a unidimensional scale measuring  
816 well-being in these populations (Winther Topp et al., 2015).

817 Work productivity: To evaluate work productivity, we will use the Lam Employment Absence and  
818 Productivity Scale, or LEAPS. It is a 10-item, self-rated scale that takes only 3 to 5 minutes for the patient to  
819 complete. It is simple and easy to use. The items were chosen based on the symptoms that have the most  
820 impact on work productivity and the most common productivity problems experienced by patients with  
821 depression. The LEAPS was recently validated in a sample of 234 consecutive working patients meeting  
822 DSM-IV criteria for MDD attending a mood disorders outpatient clinic (Lam et al, 2009).

823 Satisfaction with care: To assess satisfaction we used the Satisfaction Index- Mental Health (SIMH)(Nabati,  
824 Shea, McBride, Gavin, & Bauer, 1998). The SIMH is a 12-item, self-report instrument developed to measure  
825 patient satisfaction with mental health care (Nabati, et al., 1998). The SIMH has high internal consistency  
826 reliability (Cronbachs alpha = 0.90), test- retest reliability (r = 0.79, p = 0.05), and sensitivity to change  
827 (Nabati, et al., 1998).

828 Perceived System usability: System Usability Scale (SUS) provides a quick and dirty, reliable tool for  
829 measuring the usability. It consists of a 10-item questionnaire with five response options for respondents;  
830 from Strongly agree to Strongly disagree. Originally created by John Brooke in 1986, it allows you to evaluate

831 a wide variety of products and services, including hardware, software, mobile devices, websites and  
832 applications. As required by the NIMH, WHODAS and DSM-5 Level 1 Cross-Cutting Symptom Measure are  
833 asked only at the month 9 follow-up survey. These questions are voluntary to complete. WHODAS is a 12-  
834 item questionnaire asks about difficulties due to health conditions. Health conditions include diseases or  
835 illnesses, other health problems that may be short or long lasting, injuries, mental or emotional problems,  
836 and problems with alcohol or drugs. Think back over the past 30 days and answer these questions, thinking  
837 about how much difficulty you had doing the following activities. For each question, please circle only one  
838 response. DOI: 10.2340/16501977-2583 The DSM-5 Level 1 Cross-Cutting Symptom Measure is a self- or  
839 informant-rated measure that assesses mental health domains that are important across psychiatric  
840 diagnoses. It is intended to help clinicians identify additional areas of inquiry that may have significant  
841 impact on the individuals treatment and prognosis. In addition, the measure may be used to track changes  
842 in the individuals symptom presentation over time. This version asks adults to consider how much (or how  
843 often) they have been bothered by specific problems in the past two weeks. [https://](https://doi.org/10.1176/appi.books.9780890425596)  
844 [doi.org/10.1176/appi.books.9780890425596](https://doi.org/10.1176/appi.books.9780890425596) DSM-5 includes sensitive questions around as suicide ideation,  
845 mental health disorders including depression, anxiety, psychosis, dissociation and personality functioning,  
846 and tobacco, alcohol, and substance use.

847

848

## 6. Study Design

849

### 6.1 Phase

850

Not applicable

851

### 6.2 Design

852

We will conduct a prospective two-armed randomized control trial to test the effect of tailored mental  
853 health support on self-reported HCW mental health (anxiety and depression) during the response and  
854 recovery phases of the COVID-19 pandemic. The control group will have access to Cobalt which is usual  
855 care for all Penn Medicine employees. The Cobalt platform is web-based and is accessible from any  
856 device or desktop. Cobalt uses contextual surveys and evidence-based assessments to triage individual  
857 users to curated content and appropriate group or individual support. The current, and usual care,  
858 model is a digital version of what exists at other institutions where resources are available for staff to  
859 access wellness and mental health services. The usual care Cobalt model requires staff to personally  
860 initiate multiple steps: 1) identify a personal need for support, 2) know where to seek support and care,  
861 3) schedule an appointment, and 4) attend the appointment. In this context, the individual has to pull  
862 the resources they need and there may be several barriers to completing each step. This is particularly  
863 relevant as mental health conditions can compromise insight, motivation, and decision making, thereby  
864 making self-directed engagement in care (pull) more challenging. The study will be single-blinded and  
865 the study biostatistician will determine when to unblind the study. Given that the study compares the  
866 same process delivered as either a pull (usual care = Cobalt) or a push (intervention = Cobalt +) we  
867 believe risk is low. Nevertheless, we will engage a 3-member independent Data and Safety Monitoring  
868 Board to oversee the trial. In accordance with conventional practices, we will not identify members in  
869 advance so as not to disqualify potential proposal reviewers. To assess factors that may contribute  
870 toward accessing and using mental health resources between Cobalt versus Cobalt+, we will conduct  
871 semi-structured interviews (telephone or virtual video conference) with HCWs enrolled in Aim 1.  
872 Standardized interview guides will be created using the consolidated framework for implementation  
873 research ([https://cfirguide.org/guide/app/#/guide\\_select](https://cfirguide.org/guide/app/#/guide_select)) and thematic areas identified in literature  
874 review to ensure uniformity in how and what questions are asked of each group. Some questions within  
875 the guides will be the same between those in the traditional care arm (Cobalt) versus intervention  
876 (Cobalt+) to allow for comparison. We will interview up to 80 HCWs from Penn Medicine in order to  
877 understand the attitudes and decision-making involved in mental health strain during COVID-19. We will  
878 recruit across both arms of the Aim 1 study to investigate HCW in usual care Cobalt (n= up to 40) and

## Effect of a Digital Engagement Strategy on Healthcare Worker Mental Health and Well-being: A Randomized Controlled Trial

879 from those in the intervention arm Cobalt+ (n=up to 40). Using data from Aim 1, we will use a deviance  
880 sampling approach to identify HCW from the top and bottom 25% percentiles of anxiety and depression  
881 scales from month 6 to baseline. This deviant selection is intentional to maximize the potential to  
882 identify themes unique to high or low levels of mental health strain. Individual scale scoring will not be  
883 revealed in order to limit responder bias, increase response rates and avoid attribution bias. We intend  
884 Aim 2 study sample to be similar to the Aim 1 gender and race breakdown. Since we oversampled Black  
885 participants in Aim 1, we intend to have at least 25% Black participants in Aim 2. We will recruit HCWs  
886 using a series of e-mails (up to 4 email invitations) and text messages (up to 3 text invitations). We will  
887 contact participants to obtain consent, ensure study procedures are described, answer questions and  
888 offer a \$50 gift card for their time. The goal is to conduct up to 80 audio-recorded semi-structured  
889 interviews (~20-30 minutes). Interview questions will be aligned with themes from our preliminary  
890 studies and focus groups with front line healthcare workers early in the pandemic. Participants will be  
891 contacted one month following the end of the Aim 1 study period and consented via WTH. Participants  
892 will not be informed as to why they were selected and confidentiality will be maintained. There is  
893 variability in how individuals experience anxiety, depression, stress and overall well-being.  
894 Understanding how HCWs think about these emotions, their physical and mental states of being, and  
895 the decisions to access and utilize mental health resources are essential to the design of interventions to  
896 facilitate and support the workforce. Understanding how HCWs approach mental health assessments for  
897 themselves and the stigma associated with care is also critical in designing programs that are acceptable  
898 and used. Investigation of the factors that impact mental health care in HCWs can be supported by semi-  
899 structured interviews which ask open-ended questions and allow participants to describe key attitudes,  
900 decision-making processes, and emotions that are otherwise difficult to assess. All Aim 2 participants  
901 will be informed that, You do not have to participate in any research study offered by your director,  
902 supervisor, or co-worker. If you choose not to participate, there will be no loss of benefits to which you  
903 are otherwise entitled. Your employment is not in jeopardy should you decide not to participate If you  
904 are interested in participating, A research team member is readily available to discuss the informed  
905 consent form with you and answer questions via email or telephone communications. You are free to  
906 decline or stop participation at any time during or after the initial consenting process. Please text back  
907 the Way to Health number or email [digitalhealth@uphs.upenn.edu](mailto:digitalhealth@uphs.upenn.edu). The University of Pennsylvania has a  
908 significant financial interest in the Penn Medicine COBALT resources and delivery system used as a part  
909 of this protocol. It was developed by inventors at Penn Medicine, and if it were to be successful, the  
910 University of Pennsylvania will likely receive significant financial benefit. As a reminder, all Penn  
911 Medicine employees have access to COBALT for resources regardless of if they participate in the study.  
912 You are free to decline or stop participation at any time during or after the initial consenting process. To  
913 decline or stop participation, please email [digitalhealth@uphs.upenn.edu](mailto:digitalhealth@uphs.upenn.edu) or text in Bye to the Way to  
914 Health number. If Aim 2 participants expresses potentially sensitive information like mental health  
915 information, at the end of the interview, we will share free and confidential health resources.

### 916 *6.3 Study Duration*

917 The RCT will compare this pull model with a new model, the intervention named Cobalt+, which will  
918 proactively reach out to and engage individuals in order to reduce barriers in identifying a need for and  
919 accessing mental health care. The intervention group will have access to the same Cobalt resources as  
920 those in the usual care group but will also receive a comprehensive suite of services including: 1)  
921 monthly automated text messaging reminders and links to Cobalt resources 2) intermittent mental  
922 health assessments (PHQ-9, GAD-7) at enrollment, month 2, month 4 and month 6 which triage  
923 individuals to an opt-out appointment with a resilience coach, psychotherapist, or psychiatrist based on  
924 their results. Of note, all employees will have access to Cobalt whether they are in the study or not.  
925 Through the proposed RCT we will evaluate whether the intervention, a proactive model of care delivery  
926 (Cobalt+) impacts the primary outcome measure (depression and anxiety) and secondary outcome

## Effect of a Digital Engagement Strategy on Healthcare Worker Mental Health and Well-being: A Randomized Controlled Trial

927 measures (well-being, satisfaction with access to care, and measures of work productivity [e.g.  
928 absenteeism]). The study duration is approximately 29 months.

### 929 *6.4 Facilities*

930 The research team is highly experienced and well-positioned to execute this project rapidly and across  
931 departments and hospitals within Penn Medicine. Team members have worked closely on many clinical  
932 and research programs, conducted clinical trials using mobile and digital tools and platforms, and  
933 conducted trials specifically in the target vulnerable population, HCW. Pilot work from this team has led  
934 to multiple peer-reviewed publications in wellbeing, mental health, and deploying digital tools and  
935 platforms. We have enthusiastic support from Penn Medicine and departmental leadership in  
936 developing strategies to identify, support, and protect HCW well-being and mental health. Our team is  
937 interwoven within the frontline clinical workforce. The research team brings together expertise in real-  
938 time patient- centered engagement using digital tools (Merchant, Agarwal, Asch), digital health  
939 (Merchant, Agarwal), well-being research (Bellini, Asch, Agarwal, Wolk), survey and qualitative methods  
940 (Shea), advanced biostatistics and computational methods (Mitra) and innovations in health systems  
941 (Asch, Merchant, Agarwal). Our team also has integral roles in Penn Medicine leadership which can help  
942 with project stewardship and uptake: PI (Merchant) serves as the Penn Medicine Associate Vice  
943 President of Digital Health, Co-I (Bellini) is the Senior Vice Dean for Academic Affairs and health system  
944 lead for Cobalt, and Co-I (Asch) is the Executive Director of the Penn Medicine Center for Health Care  
945 Innovation and Innovation lead for Cobalt. Additionally, Penn is an opportune venue to conduct COVID-  
946 19 related research as a leader in the region in acute and virtual care during the pandemic. This proposal  
947 represents a natural next step to build upon our expertise and track record of success in designing,  
948 conducting, and disseminating meaningful and actionable patient and provider centered research.  
949 Advisory Board and stakeholder engagement: To insure input from providers that will inform the  
950 research, we will convene an advisory board representing entities from each (n=12) of the direct patient  
951 care groups (e.g. physicians, nurses, certified nursing assistants, lab technicians, radiology technicians  
952 physical therapists, occupational therapists, pharmacists, pharmacy technicians, patient registration  
953 staff, patient intake coordinators, environmental service personnel). We have strong existing  
954 relationships with these groups and will meet with them before the study initiates and then every 6  
955 months thereafter for input, engagement, and feedback. Some of the members of this group will also be  
956 recruitment champions identified. This step is critically important and we will work collaboratively with  
957 this group for stakeholder guidance about all aspects of execution and reporting for the study.

### 958 *6.5 Key Inclusion Criteria*

959 There are no inclusion and exclusion criteria for any subpopulation based on race/ethnicity, age, gender,  
960 status as a vulnerable population. Eligibility criteria for study enrollment will include: 1) age 18 years or  
961 older; 2) regular, daily access to a smartphone 3) able to communicate fluently in English (as the current  
962 Cobalt assessments and resources are in English at this time), 4) work at least 4 hours per week in either  
963 a hospital or outpatient based settings (e.g. physicians, nurses, certified nursing assistants, lab  
964 technicians, radiology technicians, physical therapist, occupational therapist, pharmacists, pharmacy  
965 technicians, patient registration staff, receptionists/patient intake coordinators, environmental service  
966 personnel) approximately 4 hours/week (on average 192 hours/ 48 weeks in a year) in the study time  
967 frame. Eligible participants will then have an opportunity to consent to study participation. Any HCW  
968 meeting these criteria will be eligible to participate in the research; we will not exclude any potential  
969 participant based on a priori criteria.

### 970 *6.6 Key Exclusion Criteria*

971 1). Under 18 years of age; 2) does not have regular, daily access to a smartphone 3) unable to  
972 communicate fluently in English (as the current Cobalt assessments and resources are in English at this  
973

974 time), 4) does not not work at least 4 hours per week in either a hospital or outpatient based setting, 5).  
975 Not willing to sign the informed consent document.

976

## 977 **7. Subject Recruitment**

978

### 978 *7.1 Target Population*

979

980

981

982

983

984

985

986

987

988

989

990

991

992

993

994

995

996

997

The population of interest for this proposal is HCWs who in the midst of COVID-19 are at increased risk for mental health symptoms and conditions. We will also utilize University groups and motivated mental healthcare champions to specifically promote inclusion of female and underrepresented minority HCW in the RCT and qualitative aim. This focus aligns with the RFA which identifies vulnerable populations as: medical personnel with direct patient care and NIH-designated health disparity racial/ ethnic minorities. We specifically include a broad definition of HCWs (e.g. physicians, nurses, certified nursing assistants, lab technicians, radiology technicians, physical therapists, occupational therapists, pharmacists, pharmacy technicians, patient registration staff, coroners, receptionists/patient intake coordinators, environmental service personnel) that are not routinely evaluated jointly and with the same intervention. While much of the attention in the pandemic has been on physicians and nurses we aim to focus on a broader group that is at risk for COVID-19 and mental health symptoms and conditions. our study samples demographic information, specifically gender, race, and ethnicity compared to the larger employee group. We will receive de-identified proportions of this information from University of Pennsylvania administration. Demographic information will include: % female, % male, % non-reported/missing, % American Indian/Alaskan Native, % Asian, % Black or African American, % Native Hawaiian/Pacific Islander, % White, % I do not wish to answer, % non-reported/ missing, % Hispanic / Latinx, and % non-reported/missing. The demographic information would be used for internal discussions only with the Penn Medicine research personnel listed on our IRB HSERA protocol (IRB #: 848844).

998

### 998 *7.2 Subjects at Penn 1,275*

999

### 999 *7.3 Accrual*

1000

1001

1002

1003

1004

1005

1006

1007

1008

1009

1010

1011

1012

1013

1014

1015

1016

1017

1018

1019

1020

To recruit potential study participants, we will send an email about the study to the entire Penn Medicine employee listserv, as these individuals are the same recipients of Penn Medicine news and Covid-19 updates who have received prior information about the availability of Cobalt. Emails will be sent up to 5 times to this employee list. The plan to outreach to employees in this manner has been approved by both Penn Medicine Human Resources and the Penn Medicine Chief Operation Officer. We will specifically engage recruitment champions in the study design and for support in extending the reach of the recruitment email to underrepresented minority HCWs. These recruitment champions will include each Departments Vice Chair for Diversity and Inclusion to support sending the email about the study to their Departments and groups within their Departments specifically focused on diversity and inclusion. We will also engage Centers, Departments, and Groups at Penn Medicine to support dissemination of the study announcement. These include the Office of Inclusion and Diversity, the Alliance of Minority Physicians, Penn Medicine Center for Health Equity Advancement, Bold Solutions Initiative, FOCUS on health and leadership for women, Penn Promotes research on sex and gender in health, and the Program for Health Equity in Education and Research. Furthermore, we will recruit in-person across the Penn Medicine campus such as tabling outside of prominent buildings and departments (New Pavilion and cafeterias) and attend department morning huddles / meetings to accommodate staff members who have limited access to their email accounts. We will also be intentional about diversity of representation in the images in all study materials and highlight the diversity in our project team. We base our power considerations on baseline data presented in an RCT conducted by Graham et al.<sup>92</sup> In their study, they report a mean baseline PHQ-9 of 14.0 (SE=5.0) and mean GAD-7 of 11.6 (SE=4.6). We assume a type I error rate of 2.5% (.05/2) to account for the two

## Effect of a Digital Engagement Strategy on Healthcare Worker Mental Health and Well-being: A Randomized Controlled Trial

1021 separate outcomes that we will be evaluating. We aim to enroll 1275 participants with the anticipation  
1022 that there will be 27.5% attrition.

1023

### 1024 *7.4 Patient Subject Recruitment*

1025 To recruit potential study participants, we will send an email about the study to the entire Penn  
1026 Medicine employee listserv, as these individuals are the same recipients of Penn Medicine news and  
1027 Covid-19 updates who have received prior information about the availability of Cobalt. Emails will be  
1028 sent up to 5 times to this employee list. The plan to outreach to employees in this manner has been  
1029 approved by both Penn Medicine Human Resources and the Penn Medicine Chief Operation Officer (see  
1030 letters of support). Exploratory Aim1 specifically seeks to determine if the effect of the intervention  
1031 varies across patient subgroups (e.g. race and gender) as we recognize the importance of evaluating the  
1032 effect of Cobalt in these specific populations. We will specifically engage recruitment champions in the  
1033 study design and for support in extending the reach of the recruitment email to underrepresented  
1034 minority HCWs. These recruitment champions will include each Departments Vice Chair for Diversity and  
1035 Inclusion to support sending the email about the study to their Departments and groups within their  
1036 Departments specifically focused on diversity and inclusion. We will also engage Centers, Departments,  
1037 and Groups at Penn Medicine to support dissemination of the study announcement. These include the  
1038 Office of Inclusion and Diversity, the Alliance of Minority Physicians, Penn Medicine Center for Health  
1039 Equity Advancement, Bold Solutions Initiative, FOCUS on health and leadership for women, Penn  
1040 Promotes research on sex and gender in health, and the Program for Health Equity in Education and  
1041 Research. Furthermore, we will recruit in-person across the Penn Medicine campus such as tabling  
1042 outside of prominent buildings and departments (New Pavilion and cafeterias) and attend department  
1043 morning huddles / meetings to accommodate staff members who have limited access to their email  
1044 accounts. We will also be intentional about diversity of representation in the images in all study  
1045 materials and highlight the diversity in our project team. For enrolled study participants, there is no  
1046 email or text message follow for nudge messages. However, there is one text message or email follow  
1047 up message (based on the participants communication preference) to complete survey assessments. For  
1048 example, the message notes: Hi PARTICIPANT\_FIRSTNAME, when you have a chance, please complete  
1049 this short well-being survey: It only takes about 2 minutes! Thanks for your reply! For 6 and 9 month  
1050 follow up survey reminders, we will send the following text message or email, Hi  
1051 PARTICIPANT\_FIRSTNAME, please complete the last follow up survey by clicking here: Once you  
1052 complete it, \$75 will be loaded on your ClinCard account. To promote retention, participants will be  
1053 emailed up to 4 times and texted (up to three times) to nudge survey and assessment completion. For  
1054 compensation, each participant will receive up to \$200: \$50 at enrollment, \$75 at 6 months and \$75 at 9  
1055 months for 3 total surveys. Submission for subject reimbursement will occur immediately upon  
1056 completion of surveys and assessments and occur through the Way to Health platform which facilitates  
1057 timely payment. Using data from Aim 1, we will use a deviance sampling approach to identify HCW from  
1058 the top and bottom 25% percentiles of anxiety and depression scales. This deviant selection is  
1059 intentional to maximize the potential to identify themes unique to high or low levels of mental health  
1060 strain. Individual scale scoring will not be revealed in order to limit responder bias, increase response  
1061 rates and avoid attribution bias. We will recruit participants enrolled in Aim 1 (RCT), using a series of e-  
1062 mails (up to 4 email invitations) and text messages (up to 3 text invitations). We will contact participants  
1063 to obtain informed consent for the interview to ensure study procedures are described, answer  
1064 questions and offer a \$50 gift card for their time. The goal is to conduct 80 audio-recorded semi-  
1065 structured interviews (~20-30 minutes). Interview questions will be aligned with themes from our  
1066 preliminary studies and focus groups with front line healthcare workers early in the pandemic.  
1067 Participants will be contacted one month following the end of the Aim 1 study period and consented via



1068 Way to Health. Participants will not be informed as to why they were selected, and confidentiality will  
1069 be maintained.

1070 *7.5 Subject Compensation*

1071 To promote retention, participants will be emailed up to 4 times and texted (up to three times) to nudge  
1072 survey and assessment completion. For compensation, each participant will receive up to \$200: \$50 at  
1073 enrollment, \$75 at 6 months and \$75 at 9 months for 3 total surveys. Submission for subject  
1074 reimbursement will occur immediately upon completion of surveys and assessments and occur through  
1075 the Way to Health platform which facilitates timely payment. Each participant will receive \$50 for  
1076 interview completion.

1077 **8. Study Procedures**

1078 *8.1 Consent Process*

1079 To recruit potential study participants, we will send an email about the study to the entire Penn  
1080 Medicine employee listserv, these individuals are the same recipients of Penn Medicine news and  
1081 COVID-19 updates who have received prior information about the availability of Cobalt. Emails will be  
1082 sent up to 4 times to this employee list. This proposal includes a letter of support from the Penn  
1083 Medicine Director of Human Resources and Penn Medicine Chief Operation Officer indicating support  
1084 for the project and access to these listservs. Participants will provide electronic informed consent before  
1085 participation in the study. The electronic consent form is hosted on Way to Health, HIPAA Compliant  
1086 Platform. Participants will be notified that enrollment is voluntary and declining to participate will not  
1087 change their access to Cobalt or have an impact on their employment. Participants will be consented  
1088 with ample time to discuss consent. Participants will be given contact information (including telephone  
1089 and email) for the principal investigator (Dr. Merchant), and the University of Pennsylvania IRB to  
1090 address any potential concerns. A detailed Manual of Operations will be developed for the study and  
1091 procedures will be designed to ensure efficient and prompt updating. Our project is designed to function  
1092 entirely remotely (recruitment, consent, enrollment, survey completion) All study participants read and  
1093 review the informed consent document independently on Way to Health but research team members  
1094 are readily available to discuss the form and answer questions via email or telephone communications,  
1095 all noted on the instructions of the informed consent document on Way to Health. All investigators have  
1096 experience in developing a manual of operations. All study staff will undergo a thorough training and  
1097 certification procedure prior to protocol implementation, including CITI Course in the Protection of  
1098 Human Research Participants online training in research ethics. The initial training will be conducted by  
1099 the PI and will include an overview of the study, detailed explanation of the study protocol, and hands-  
1100 on practice of specific protocol components. All study staff will be observed conducting randomly  
1101 selected protocol duties at least twice annually and evaluated using specifically designed checklists.

1102 *8.1.1.1 Waiver or Alteration of Informed Consent*

1103 Not applicable

1104 *8.1.1.2 Minimal Risk*

1105 Since we are recruiting Penn Medicine employees, the informed consent highlights how their Penn  
1106 Medicine employer, director, supervisor, or co-worker may be an investigator in this research study. The  
1107 document also includes language on how if the individual chooses not to participate, there will be no  
1108 loss of benefits to which they are otherwise entitled. Their employment is not in jeopardy based on their  
1109 enrollment status. Given that the study compares the same process delivered as either a pull (usual care  
1110 = Cobalt) or a push (intervention = Cobalt +) we believe risk is low. Nevertheless, we will engage a 3-  
1111 member independent Data and Safety Monitoring Board to oversee the trial. In accordance with  
1112 conventional practices, we will not identify members in advance so as not to disqualify potential  
1113 proposal reviewers. All subjects will be consented for participation and will have the ability to withdraw  
1114 at any time. There is minimal risk to the participants as Penn Cobalt will triage patients accordingly to  
1115 level of services for mental health support. All qualitative results will be de-identified and any collected

1116 PHI data will be stored securely and separately. Participants can elect to not participate in the study  
1117 without any consequences. Participants can also opt-out of participating at any time. All employees have  
1118 access to Cobalt and associated services; participants in the intervention arm may be less likely to  
1119 experience risks associated with the research because they are receiving pushed services designed to  
1120 reduce barriers to access of mental health services.

1121 *8.1.1.3 Impact on Subject Rights and Welfare*

1122 We will be obtaining informed consent from patients who have been provided a thorough explanation  
1123 of the study and the opportunity to ask any questions about study participation. Patients will be read  
1124 the entire consent and given the option to participate.

1125 *8.1.1.4 Waiver Essential to Research*

1126 All participants will be recruited through remote procedures.

1127 *8.1.1.5 Written Statement of Research*

1128 This study does not operate under a written statement of research.

1129 *8.2 Procedures*

1130 We will conduct a prospective two-armed randomized control trial to test the effect of tailored mental  
1131 health support on self-reported HCW mental health (anxiety and depression) during the response and  
1132 recovery phases of the COVID-19 pandemic. The control group will have access to Cobalt which is usual  
1133 care for all Penn Medicine employees. The Cobalt platform is web-based and is accessible from any  
1134 device or desktop. Cobalt uses contextual surveys and evidence-based assessments to triage individual  
1135 users to curated content and appropriate group or individual support. The current, and usual care,  
1136 model is a digital version of what exists at other institutions where resources are available for staff to  
1137 access wellness and mental health services. The usual care Cobalt model requires staff to personally  
1138 initiate multiple steps: 1) identify a personal need for support, 2) know where to seek support and care,  
1139 3) schedule an appointment, and 4) attend the appointment. In this context, the individual has to pull  
1140 the resources they need and there may be several barriers to completing each step. This is particularly  
1141 relevant as mental health conditions can compromise insight, motivation, and decision making, thereby  
1142 making self-directed engagement in care (pull) more challenging. The RCT will compare this pull model  
1143 with a new model, the intervention named Cobalt+, which will proactively reach out to and engage  
1144 individuals in order to reduce barriers in identifying a need for and accessing mental health care. The  
1145 intervention group will have access to the same Cobalt resources as those in the usual care group but  
1146 will also receive a comprehensive suite of services including: 1) monthly automated text messaging  
1147 reminders and links to Cobalt resources 2) intermittent mental health assessments (PHQ-9, GAD-7) at  
1148 enrollment, month 2, month 4 and month 6 which triage individuals to an opt-out appointment with a  
1149 resilience coach, psychotherapist, or psychiatrist based on their results. Of note, all employees will have  
1150 access to Cobalt whether they are in the study or not. Through the proposed RCT we will evaluate  
1151 whether the intervention, a proactive model of care delivery (Cobalt+) impacts the primary outcome  
1152 measure (depression and anxiety) and secondary outcome measures (well-being, satisfaction with  
1153 access to care, and measures of work productivity [e.g. absenteeism]). Difficulties due to health  
1154 conditions mental health domains will be assessed at the month 9 follow up survey.

1155 **9. Analysis Plan**

1156 We will conduct an intent to treat (ITT) analysis. The ITT analysis will include all randomized participants  
1157 in the groups to which they were randomly assigned. Baseline demographic and clinical characteristics  
1158 will be reported as frequency and percent for categorical variables and median and distribution for  
1159 continuous variables. We will compare baseline characteristics between intervention and control arms  
1160 using t-tests for continuous variables and chi-squared tests for categorical variables. The goal of these  
1161 comparisons will be to determine if the two arms are balanced on baseline variables after  
1162 randomization. Our primary analysis will focus on the difference in PHQ-9 and GAD-7 scores at 6 months  
1163 between the two arms. We will estimate and test differences in means between arms using two- sample

1164 t-tests and generalized linear models that account for baseline measurements of PHQ-9 and GAD-7.  
1165 Missing data will be assessed for patterns and multiple imputation will be used if deemed appropriate.  
1166 Baseline covariates that are found to be imbalanced between arms may be adjusted for in the model if  
1167 they were deemed to be potential confounders a priori to adjust for potential confounding and for  
1168 efficiency gain. We will use all available PHQ-9 and GAD-7 scores on eligible patients from randomization  
1169 through the last observation. A  $p < 0.05$  will be deemed statistically significant but emphasis will be placed  
1170 on point estimates and confidence intervals. Secondary outcomes of mental healthcare utilization,  
1171 satisfaction with connection to services, and qualitative feedback on mobile engagement will also be  
1172 modeled using GEE with mean models specified based on the distribution of the specific outcome (e.g.  
1173 Poisson or negative binomial for number of mental healthcare visits, logit for binary responses).  
1174 Potential associations between system-level or regional level case burden and PHQ-9 and GAD-7 scores  
1175 at baseline and over-time will be assessed with generalized linear models and GEE. Exploratory Aim 1:  
1176 Statistical approach: The statistical approach for studying HTE will be to test for the statistical  
1177 interaction between the intervention and race and separately by gender in the GEE models described  
1178 above. Although our study was not designed specifically to detect HTE, if 20% of our trial participants  
1179 are Black (based on targeted recruitment efforts), our study will achieve 80% power (assuming type I  
1180 error of 0.05) to detect a 1.8 difference in mean GAD-7 scores and a 2.0 difference in mean PHQ-9  
1181 scores between arms at 6 months. We anticipate that at least 50% of participants will be female. Hence,  
1182 our study is powered to detect a 1.2 difference in mean GAD-7 scores and a 1.3 difference in mean PHQ-  
1183 9 scores between arms at 6 months among women.  
1184 Aim 2: Power: no power calculation will be performed for this qualitative aim consistent with prior  
1185 qualitative aims we will aim to interview 80 participants from Aim 1 and evaluate themes until  
1186 saturation Analysis: Using thematic analysis, we will analyze HCW interview transcripts to identify  
1187 recurring themes in attitudes and beliefs toward mental health, well-being, and mental health care or  
1188 resources. Interview audio will be transcribed and uploaded into Nvivo software (available as a Penn  
1189 resource). In total we plan for up to 80 semi-structured interviews, or until inductive thematic  
1190 saturation<sup>101</sup> is reached in each group meaning no new themes are emerging. Analysis of qualitative,  
1191 semi-structured interviews utilizes a series of systematic steps in transcribing, developing a code for  
1192 thematic content, and subsequent coding of interviews. A modified grounded theory approach will be  
1193 used to evaluate interview transcriptions. Analysis will begin shortly after the first few interviews are  
1194 completed. An emergent, iterative open coding process will be followed and two trained coders from  
1195 the research team will jointly read five transcripts and draft the outline of a codebook. Each coder will  
1196 then independently code five more transcripts and adjust the codebook as needed. We will review the  
1197 codes, resolve discrepancies and finalize coding procedures. Following adjudication of any areas of  
1198 discrepancy, the research team coders will be assigned batches of transcripts for independent coding,  
1199 sharing 25% of the transcripts in each batch for ongoing inter-rater agreement assessment. We will  
1200 review coding for interrater reliability, measured by Cohens kappa (0.8), and overall comprehensiveness.  
1201 If a high kappa is not achieved, further double coding and refining of the code will continue. This  
1202 approach to coding and analyzing qualitative data has been widely used. Strategies used to ensure  
1203 reliability and validity in the qualitative data will include a comprehensive audit trail, checks between  
1204 coders, team debriefing, and corroboration of findings across participants.

## 1205 **10. Subject Confidentiality**

1206 The research team will exercise extreme caution with identifiable private information. Patients  
1207 randomized to the intervention arm will receive text messages from Way to Health. In the patients  
1208 informed consent, they are instructed and agree by signing the document that they will not disclose  
1209 personal health information (PHI) on the Way to Health texting platform and only respond to the text

## Effect of a Digital Engagement Strategy on Healthcare Worker Mental Health and Well-being: A Randomized Controlled Trial

1210 message prompts. When patient participants (both control and intervention) text into the Way to Health  
1211 or complete a survey, the research team will receive email notification immediately. The research team  
1212 is instructed to review the message within 1-4 hours of delivery, Monday through Friday, 8 am to 5pm.  
1213 The line will be closed on Saturday and Sunday however patient participants will receive an out of office  
1214 message if they text in; the messages notes, Thank you for reaching out, we will get back to you when  
1215 we get back in the office! and a Patient Inquiry Incident is created. An exception to confidentiality is if  
1216 significant suicidal ideation, is exhibited through text message or via PHQ-9 question 9 or 9 or DSM-5  
1217 question 11. PHQ-9, Question 9 asks about thoughts of being better off dead or of hurting oneself in  
1218 some way over the last two weeks with an associated scale delineating not at all, several days, more  
1219 than half the days, or nearly every day. The DSM-5, question 11 asks about During the past TWO (2)  
1220 WEEKS, how much (or how often) have you been bothered by the following problems? Thoughts of  
1221 actually hurting yourself? with an associated scale delineating None: Not at all; Slight Rare, less than a  
1222 day or two; Mild: Several days; Moderate: More than half the days; and Severe: Nearly every day. Those  
1223 indicating any response beyond not at all or none not at all will be triaged to Penn Behavioral Health  
1224 Corporate Services / EAP. This is the current standard of care and will be the same for both Cobalt and  
1225 Cobalt plus in this trial. EAP will receive only the participants phone number via email. If EAP logs into  
1226 Cobalt, a HIPAA compliant platform, they can view the studys participants phone number, first and last  
1227 name and PHQ-9 score and PHQ-9 question 9 score. In case Penn Behavioral Health Corporate Services /  
1228 EAP is unable to contact a study participant within the 72-hour period, a research team member will call  
1229 the study participant and complete the Ask Suicide-Screening Questions (ASQ) and NIMH TOOLKIT:  
1230 OUTPATIENT Brief Suicide Safety Assessment.

### 1231 *10.1 Subject Privacy*

1232 Aim 2 transcripts and audio files will be saved on a Penn Medicine managed, HIPAA compliant server.  
1233 Interview audio-recordings will be transcribed verbatim and all identifiers will be removed. The  
1234 recording and transcript will be kept a secure and locked area with access limited to designated  
1235 researchers. After we analyze the recordings, we will destroy recordings after data analysis or  
1236 completion of the study. All encounters will take place online via BlueJeans or Way to Health, HIPAA  
1237 compliant platform. or Zoom videoconference. All encounters will take place in-person in a secure  
1238 private room or online via Zoom (other Penn approved video conferencing platform) or Way to Health,  
1239 HIPAA compliant platform. When utilizing Zoom for audio recordings, additional steps will be made by  
1240 the research team to ensure participant safety. Based on guidelines, researchers will ensure the  
1241 following settings for privacy and compliance for Penn Zoom. 1) Researchers will turn off the Personal  
1242 Meeting ID setting and instead opt for the meeting ID to be generated automatically, allowing for new  
1243 links and meeting IDs to be created for each meeting. 2) Research staff will turn off Cloud Recordings  
1244 and ensure only local recordings that are HIPAA compliant are used as they are encrypted and managed  
1245 by PMACS/DART or UPHS. Interview audio-recordings will be transcribed verbatim and all identifiers will  
1246 be removed. The recording and transcript will be kept a secure and locked area with access limited to  
1247 designated researchers. After we analyze the recordings, we will destroy recordings after data analysis  
1248 or completion of the study. All survey data will be stored in a secure, web-based database (Way to  
1249 Health or REDCap) where a study ID number will be generated for each patient. A link between the  
1250 study ID number and the patient PHI will need to be maintained to ensure that the study staff can track  
1251 recruitment efforts to potential participants and to avoid contacting any patients who have previously  
1252 declined to participate. To ensure that patient confidentiality is preserved, individual identifiers (such as  
1253 name) are stored in a single password protected system that is accessible to study research, analysis and  
1254 IT staff only. This system is hosted on site at UPenn and is protected by a secure firewall. Once a  
1255 participant is in this system, they will be given a unique study ID number. Any datasets and computer

## Effect of a Digital Engagement Strategy on Healthcare Worker Mental Health and Well-being: A Randomized Controlled Trial

1256 files that leave the firewall will be stripped of all identifiers besides the study ID and individuals will be  
1257 referred to by their study ID only. The study ID will also be used on all analytical files. Way to Health and  
1258 REDCap are secure web applications for building and managing online surveys and databases. Privacy of  
1259 all study data will be maintained by restricting access to the identifiable information only to approved  
1260 study staff who have received subject confidentiality and privacy training. Study coordinators will access  
1261 patient contact information from the database to conduct recruitment phone calls. The study  
1262 coordinator will review the consent script, which will include a description of the voluntary nature of  
1263 participation, the study procedures, risks and potential benefits in detail. Participants will be told that all  
1264 information will be kept strictly confidential, except as required by law. Subjects will be provided a copy  
1265 of the consent document. All efforts will be made by study staff to ensure subject privacy. Enrollment  
1266 will be conducted by the study coordinators who will enter patient information directly into the Way to  
1267 Health platform once a participant has consented to participate. This database is hosted on a secure  
1268 server as detailed in the subject confidentiality section. Study coordinators may have to contact patients  
1269 in the intervention and their support partners during the course of the study and will use the WTH  
1270 database to access contact information to facilitate this contact. If suicidal ideation, is exhibited through  
1271 text message or via PHQ-9 question 9 or DSM-5 Question 11. PHQ-9, Question 9 asks about thoughts of  
1272 being better off dead or of hurting oneself in some way over the last two weeks with an associated scale  
1273 delineating not at all, several days, more than half the days, or nearly every day. The DSM-5, question 11  
1274 asks about During the past TWO (2) WEEKS, how much (or how often) have you been bothered by the  
1275 following problems? Thoughts of actually hurting yourself? with an associated scale delineating None:  
1276 Not at all; Slight Rare, less than a day or two; Mild: Several days; Moderate: More than half the days;  
1277 and Severe: Nearly every day. Those indicating any response beyond not at all or none not at all will be  
1278 triaged to Penn Behavioral Health Corporate Services / EAP. This is the current standard of care and will  
1279 be the same for both Cobalt and Cobalt plus in this trial. In case Penn Behavioral Health Corporate  
1280 Services / EAP is unable to contact a study participant within the 72-hour period, a research team  
1281 member will call the study participant and complete the Ask Suicide-Screening Questions (ASQ) and  
1282 NIMH TOOLKIT: OUTPATIENT Brief Suicide Safety Assessment. This will be explained to the participant in  
1283 the consent process and when the details of study participation are explained by the coordinator. If a  
1284 participant books an appointment at the TEAMS Clinic, the research team will receive data from their  
1285 PennChart such as if appointments are fulfilled or cancelled/skipped. Survey data will be submitted to  
1286 the National Institute of Mental Health Data Archive (NDA) at the National Institutes of Health (NIH).  
1287 NDA is a large database where deidentified study data from many NIH studies are stored and managed.  
1288 De- identified study data means that all personal information (such as name, address, birthdate and  
1289 phone number) is removed and replaced with a code number. PHI will not be shared with anyone  
1290 outside the parameters of the study as detailed in the Consent/HIPAA process.

### 1291                    10.2            *Data Disclosure*

1292 Survey data will be submitted to the National Institute of Mental Health Data Archive (NDA) at the  
1293 National Institutes of Health (NIH). NDA is a large database where deidentified study data from many  
1294 NIH studies are stored and managed. De- identified study data means that all personal information (such  
1295 as name, address, birthdate and phone number) is removed and replaced with a code number. PHI will  
1296 not be shared with anyone outside the parameters of the study as detailed in the Consent/HIPAA  
1297 process.

### 1298                    10.3            *Data confidentiality*

1299 The following methods will be employed to protect patient PHI for this research study:

Effect of a Digital Engagement Strategy on Healthcare Worker Mental Health and Well-being: A Randomized Controlled Trial

1300 x Computer-based files will only be made available to personnel involved in the study through the use of  
1301 access privileges and passwords.

1302 x Prior to access to any study-related information, personnel will be required to sign statements  
1303 agreeing to protect the security and confidentiality of identifiable information.

1304 x Wherever feasible, identifiers will be removed from study-related information.

1305 x A Certificate of Confidentiality will be obtained, because the research could place the subject at risk of  
1306 criminal or civil liability or cause damage to the subject's financial standing, employability, or liability.

1307 x Precautions are in place to ensure the data is secure by using passwords and encryption, because the  
1308 research involves web-based surveys.

1309 x Audio and/or video recordings will be transcribed and then destroyed to eliminate audible  
1310 identification of subjects.

1311 11. Consent Process Overview

1312 Participants will enroll in this study via a remote recruitment process. The study coordinator will review  
1313 the consent script, which will include a description of the voluntary nature of participation, the study  
1314 procedures, risks and potential benefits in detail. Participants will be told that all information will be  
1315 kept strictly confidential, except as required by law. Subjects will be provided a copy of the consent  
1316 document. All efforts will be made by study staff to ensure subject privacy. Enrollment will be conducted  
1317 by the study coordinators who will enter patient information directly into the Way to Health platform  
1318 once a participant has consented to participate.

1319 11.1 Potential Study Risks

1320 We are requesting a waiver of the requirement to document consent and HIPAA authorization with a  
1321 signature for participants enrolled into this study since we believe that the research presents no more  
1322 than minimal risk of harm to subjects and involves no procedures for which written consent is normally  
1323 required outside of the research context. [45 CFR 46.117(c)(2)] Participants will enroll in this study via a  
1324 remote recruitment process, and therefore, we will read the IRB-approved Consent/HIPAA script over  
1325 the phone to each participant and ask them to provide verbal consent and verbal HIPAA authorization  
1326 for use of their data in the study. After a patient provides verbal consent, the coordinator will select this  
1327 option on the Consent/HIPAA screen on the participants' profile that was created during enrollment on  
1328 the WTH platform for this study. A copy of the Consent/HIPAA document will be included in the device  
1329 packet provided to them by mail to the patients' home address.

1330 11.2 Potential Study Benefits

1331 All participants will have access to Cobalt, digital mental health and well-being platform which provides  
1332 stepped care based on needs. Additionally, participants using either Cobalt or Cobalt+ may identify  
1333 depression or anxiety otherwise unknown to them and then will be connected to care. The direct  
1334 benefit to human subjects is in the use of Cobalt (usual care) and for those who are in the Cobalt+  
1335 intervention arm, access to a pushed model of care where resources are opt-out. The information

1336 learned from this study will hopefully help contribute to the fields of digital health and mental health.  
1337 The risks are reasonable in relation to the importance of knowledge expected to be gained. Information  
1338 learned from this study could improve our understanding of how digital platforms can be used to  
1339 engage participants, measure mental health using validated scales, and connection individuals to  
1340 resources and care. We will also gain insights about how these platforms impact access to care and  
1341 perceived barriers to care in healthcare workers. Ultimately, the data can be used to better understand  
1342 and improve strategies for protecting and supporting the mental health of healthcare workers  
1343 throughout the COVID-19 pandemic and its associated phases, but also in the future.

1344 *11.3 Alternatives to Participation*

1345 Not participate in the study. As a reminder, all Penn Medicine and University of Pennsylvania have  
1346 access to Cobalt resources, regardless of their participation in the study.

1348 *11.4 Data and Safety Monitoring*

1349 The study will be single-blinded and the study biostatistician will determine when to unblind the study.  
1350 Given that the study compares the same process delivered as either a pull (usual care = Cobalt) or a  
1351 push (intervention = Cobalt +) we believe risk is low. Nevertheless we will engage a 3-member  
1352 independent Data and Safety Monitoring Board to oversee the trial. In accordance with conventional  
1353 practices, we will not identify members in advance so as not to disqualify potential proposal reviewers.  
1354 Given that the study compares the same process delivered as either a pull (usual care) or a push  
1355 (intervention = well-being platform) we believe risk is low. Nevertheless, we will engage a 3-member  
1356 independent Data and Safety Monitoring Board to oversee the trial. In accordance with conventional  
1357 practices, we will not identify members in advance so as not to disqualify potential proposal reviewers.  
1358 These three external investigators will have expertise in mental health and wellness, employee health,  
1359 and digital health. In accordance with conventional practices, we will not identify members in advance  
1360 so as not to disqualify potential proposal reviewers. The responsibilities of the DSMB will include:  
1361 Reviewing the research protocol, consent, and plans for DSMB Evaluate the progress of the trial:  
1362 recruitment, retention, data quality, and adverse events Protection of participant safety Ensure high  
1363 standards for privacy and no breach of data security Provide written summary reports to the PI  
1364 (Merchant) and investigators after convening Provide a written summary report to the NIH funding body  
1365 if required This study will not have pre-specified stopping rules. The study will be single-blinded and the  
1366 study biostatistician will determine when to unblind the study. DSMB members will be independent  
1367 from any professional or financial conflict of interest with the research project and/or study  
1368 investigators. The DSMB will meet at least once yearly via phone or virtual conference calls for the  
1369 duration of the project. The DSMB will elect a Chair to moderate the meetings. At the initial meeting,  
1370 the DSMB will review and approve all study protocols before study initiation to ensure participant  
1371 safety. Protocols will include formal procedures for reporting and tracking all adverse reactions to the  
1372 NIH and IRBs; tracking progress in the study; and identifying any need for premature termination of the  
1373 protocol. At subsequent meetings, the DSMB will be provided with summary study progress reports and  
1374 adverse events. The DSMB will provide a summary report following each meeting. We will not require  
1375 the DSMB to conduct interim analyses of data prior to the end of the study. We ensure that there are no  
1376 conflicts of interest with the DSMB study team or proposed institutions. Per our Data Safety and  
1377 Monitoring plan, submitted on 10/14/2020, pages 7-9 outlines how the research team and DSMB will  
1378 handle and report unexpected and adverse events. A brief overview is below: According to the Penn  
1379 Manual for Clinical Research / Office for Human Research Protections, an unanticipated problem is any  
1380 incident, experience, or outcome that meets all of the following criteria: unexpected; related or possibly

Effect of a Digital Engagement Strategy on Healthcare Worker Mental Health and Well-being: A  
Randomized Controlled Trial

1381 related to participation in the research; and suggests that the research places subjects or others at a  
1382 greater risk of harm than was previously known or recognized. Since these are, by definition,  
1383 unanticipated, it is impossible to state, a priori, what kind of unanticipated problems we expect in the  
1384 trial. However, unanticipated problems in the trial might include differential rates across treatment  
1385 groups of increased rates of mental health appointments or emotional distress. The trial will rely on a  
1386 participants family or friend to report death and a participant self-report for other unanticipated  
1387 problems.  
1388  
1389  
1390  
1391  
1392  
1393  
1394  
1395  
1396  
1397  
1398  
1399  
1400  
1401  
1402  
1403  
1404  
1405  
1406  
1407  
1408  
1409  
1410  
1411  
1412  
1413  
1414  
1415  
1416  
1417  
1418  
1419  
1420  
1421  
1422  
1423  
1424  
1425  
1426  
1427  
1428



1429  
1430  
  
1431  
1432  
1433  
1434  
1435  
1436  
1437  
1438  
1439  
1440  
1441  
1442  
1443  
1444  
1445  
1446  
1447  
1448  
1449  
1450  
1451  
1452  
1453  
1454  
1455  
1456  
1457  
1458  
1459  
1460  
1461  
1462  
1463  
1464  
1465  
1466  
1467  
1468  
1469

**Cobalt Plus Data and Safety Monitoring Plan**  
**14 October 2021**

**1. Summary of the Protocol:**

*A brief description of the study design (e.g., interventions, procedures, tests and scans, biospecimen collection, interviews and focus groups, study visits)*

We will conduct a prospective two-armed randomized control trial to test the effect of tailored mental health support on self-reported HCW mental health (anxiety and depression) during the response and recovery phases of the COVID-19 pandemic. The control group will have access to Penn Cobalt, a digital platform for mental health care and support, which is usual care for all Penn Medicine employees. The Cobalt platform is web-based and is accessible from any device or desktop. Cobalt uses evidence-based surveys and assessments on mental health to triage individual users to curated content and appropriate group or individual support. The current, and usual care, model represents a digital version where resources are available for staff to access wellness and mental health services on their own. The usual care Cobalt model requires staff to initiate and navigate multiple steps on their own which include:

- identify a personal need for support,
- know where to seek support and care,
- schedule an appointment, and
- attend the appointment.

In this standard of care model, the individual staff member has to not only identify a need, but then “pull” the resources they need towards them. There may be several barriers to completing each step including time, stigma, lack of knowledge, among others. This is particularly relevant as mental health conditions can compromise insight, motivation, and decision making, thereby making self-directed engagement in care (“pull”) more challenging.

The RCT will compare the standard “pull” model with a new model, the intervention named “Cobalt+,” which will proactively reach out to and engage individuals in and attempt to reduce barriers inherent to identifying a need for and accessing mental health care. The intervention group will have access to the same Cobalt resources as those in the usual care group but will also receive a comprehensive suite of services delivered to them including:

- monthly automated text messaging engagement and links to Cobalt resources
- intermittent mental health assessments (PHQ-9, GAD-7) at enrollment, month 2, month 4 and month 6 which triage individuals to an appointment with a resilience coach, psychotherapist, or psychiatrist based on their results.

Of note, all employees will have access to Cobalt whether they are in the study or not. The proposed RCT will evaluate whether a proactive model of care delivery (the intervention named Cobalt+) impacts the primary outcome measure (depression and anxiety) and secondary outcome measures (well-being, satisfaction with access to care, and measures of work productivity [e.g. absenteeism]) as compared to usual care.

Effect of a Digital Engagement Strategy on Healthcare Worker Mental Health and Well-being: A Randomized Controlled Trial

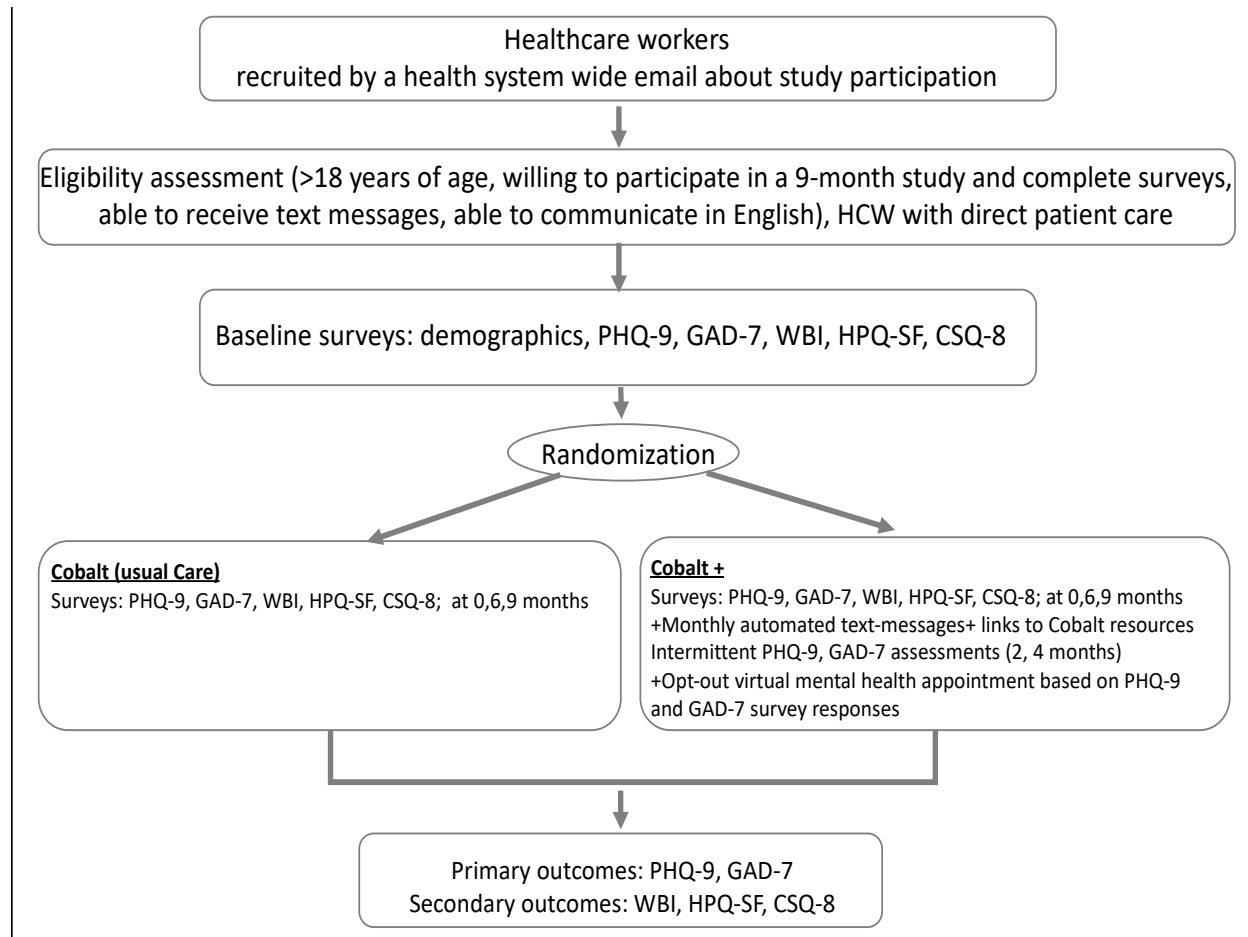

1470  
1471

1472 *Primary and secondary outcome measures/endpoints*

1473 The primary outcome will be depression and anxiety as measured by the Patient Health Questionnaire  
1474 (PHQ-9) and General Anxiety Disorder (GAD-7) respectively.

- 1475 • PHQ-9 and GAD-7 have been validated and used in multiple studies and provide easy, simple  
1476 scales to quickly assess for depression and anxiety. PHQ9 is a 9-item score which ranges from 0  
1477 (least depressed) to 27 (most depressed).
- 1478 • GAD-7 is a 7- item scale which assess the frequency of anxiety symptoms over the past two  
1479 weeks on a 4-point Likert-scale ranging from 0 (never) to 3 (nearly every day). The total score of  
1480 GAD-7 ranged from 0 to 21, with increasing scores indicating more severe functional  
1481 impairments as a result of anxiety.

1482  
1483 Secondary outcomes are:

- 1484 • Well-being index: The Well-being index (WBI) is a nine-question survey validated for use in HCW  
1485 populations and considered important to health systems in managing the well-being of their  
1486 workforce.
- 1487 • Work productivity: To evaluate work productivity, we will use the World Health Organization  
1488 Health and Work Performance Questionnaire (HPQ) short form. The HPQ is a validated self-  
1489 report instrument designed to estimate the workplace costs of health problems with regard to  
1490 reduced job performance, absence due to sickness, and work-related injuries and accidents. We  
1491 will administer the short form which is an 11-question survey focused on absenteeism and  
1492 presenteeism.

Effect of a Digital Engagement Strategy on Healthcare Worker Mental Health and Well-being: A Randomized Controlled Trial

- 1493
- 1494
- 1495
- 1496
- Satisfaction with care: Client Satisfaction with Care (CSQ)-8 is a brief 8-item unidimensional well-established scale for assessing patient’s satisfaction with overall outpatient health care. It has been shown to be reliable and valid in assessing care across a range of settings.

1497 All potential study participants will be screened via a self-report survey on REDCap (a HIPAA compliant survey and data capture platform). Criteria will be evaluated through REDCap branching logic.

1498

1499

1500 *Sample size and target population*

1501 We aim to enroll 1250 participants with the anticipation that there will be 20% attrition.

1502

1503 We will recruit health care workers who provide direct patient care approximately 4 hours/week (on average 192 hours/ 48 weeks in a year) in the study time frame across the Penn Medicine Health System, this includes: the Hospital of the University of Pennsylvania, Penn Presbyterian Medical Center, Pennsylvania Hospital, Chester County Hospital, Penn Medicine Lancaster General Hospital and Penn Medicine Princeton. All sites will be included in one central Institutional Review Board system.

1504

1505

1506

1507

1508

1509 *Inclusion/exclusion criteria and how the criteria will be evaluated*

1510 There are no inclusion and exclusion criteria for any subpopulation based on race/ethnicity, age, gender, status as a vulnerable population. Considering the disproportionate impact of COVID-19 on underrepresented minority populations and historic barriers to access to mental health care for this population, we will aim for inclusivity of this group in study participation. Exploratory Aim 1 specifically seeks to determine if the effect of the intervention varies across patient subgroups (e.g., gender and race).

1511

1512

1513

1514

1515

1516

1517 Eligibility criteria include:

- 1518 1) age 18 years or older
- 1519 2) regular, daily access to a smartphone
- 1520 3) able to communicate fluently in English (as the current Cobalt assessments and resources are in English at this time)
- 1521
- 1522 4) provide direct patient care (e.g., physicians, nurses, certified nursing assistants, lab technicians, radiology technicians, physical therapist, occupational therapist, pharmacists, pharmacy technicians, patient registration staff, receptionists/ patient intake coordinators, environmental service personnel) approximately 4 hours/week (on average 192 hours/ 48 weeks in a year) in the study time frame.
- 1523
- 1524
- 1525
- 1526
- 1527

1528 Eligible participants will be approached to complete informed consent. Any HCW meeting these criteria will be eligible to participate in the research; we will not exclude any potential participant based on a priori criteria.

1529

1530

1531

1532 Exclusion criteria include:

- 1533 1). Under 18 years of age
- 1534 2). does not have regular, daily access to a smartphone
- 1535 3). unable to communicate fluently in English (as the current Cobalt assessments and resources are in English at this time)
- 1536
- 1537 4). does not provide direct patient care approximately 4 hours/week (on average 192 hours/ 48 weeks in a year) in the study time frame
- 1538
- 1539 5). Not willing to provide informed consent.

1540 **2. Roles and Responsibilities**

1541 *Identification and description of individuals responsible for monitoring the trial (e.g., PI, ISM, DSMB),*  
1542 *their roles, qualifications, and the frequency of the monitoring activities.*

1543 The Data and Safety Monitoring Board (DSMB) is an independent group of experts convened to protect  
1544 the safety of research subjects and to ensure that the scientific goals of the project are being met. They  
1545 will be an independent group of experts charged with reviewing study data for data quality and  
1546 integrity, adherence to the protocol, participant safety, and study conduct and progress. During the  
1547 intervention phase, the DSMB will monitor survey data (as available) and will monitor and investigate  
1548 reports of safety concerns relating to study participants. The DSMB is a multidisciplinary group with a  
1549 written charge, with members appointed by the PI. The DSMB can be advisory to the NIMH as needed.  
1550 DSMB composition includes the following:

- 1551 (1) A physician with expertise in health systems and mental health conditions  
1552 (2) A mental health epidemiologist with expertise in longitudinal analysis, field trials, and clinical  
1553 trial data  
1554 (3) An epidemiologist, statistician, computer scientist, and a mental health services researcher  
1555 studying the outcomes, quality of care, and pharmacoepidemiology of patients with serious  
1556 mental disorders

1557  
1558 DSMB members will be independent from any professional or financial conflict of interest with the  
1559 research project and/or study investigators. The DSMB will meet at least once yearly via phone or virtual  
1560 conference calls for the duration of the project. The DSMB will elect a Chair to moderate the meetings.  
1561 At the initial meeting, the DSMB will review and approve all study protocols before study initiation to  
1562 ensure participant safety. Protocols will include formal procedures for reporting and tracking all adverse  
1563 reactions to the NIH and IRBs; tracking progress in the study; and identifying any need for premature  
1564 termination of the protocol. At subsequent meetings, the DSMB will be provided with summary study  
1565 progress reports and adverse events. The DSMB will provide a summary report following each meeting.  
1566 We will not require the DSMB to conduct interim analyses of data prior to the end of the study. We  
1567 ensure that there are no conflicts of interest with the DSMB study team or proposed institutions.

1568  
1569 Below are anticipated DSMB responsibilities:

- 1570 • Review the research protocol, informed consent documents and plans for data safety and  
1571 monitoring;  
1572 • Recommend subject recruitment be initiated after receipt of a satisfactory protocol;  
1573 • Evaluate the progress of the trial, including periodic assessments of data quality and timeliness,  
1574 recruitment, accrual and retention, participant risk versus benefit, and other factors that can affect  
1575 study outcome;  
1576 • Consider factors external to the study when relevant information becomes available, such as  
1577 scientific or therapeutic developments that may have an impact on the safety of the participants or  
1578 the ethics of the trial;  
1579 • Review study performance, make recommendations and assist in the resolution of problems  
1580 reported by the PI;  
1581 • Protect the safety of the study participants;  
1582 • Monitor and investigate suspected and unexpected severe adverse events (SAEs) and to  
1583 unanticipated problems and determine if study is related or not;  
1584 • Report to NIH on the safety and progress of the trial;  
1585 • Make recommendations to the NIH concerning continuation, termination or other modifications of  
1586 the trial based on the observed beneficial or adverse effects of the treatment under study;

Effect of a Digital Engagement Strategy on Healthcare Worker Mental Health and Well-being: A Randomized Controlled Trial

- 1587 • Ensure the confidentiality of the study data and the results of monitoring; and,
- 1588 • Assist the NIH by commenting on any problems with study conduct, enrollment, sample size, and/or
- 1589 data collection;
- 1590 • Provide written summary reports to the PI (Merchant) and investigators after convening;
- 1591 • Provide a written summary report to the funding body if required.

1592

1593 We propose the following for the DSMB meetings:

- 1594 • At the first meeting the DSMB will discuss the protocol, suggested modifications, and establish
- 1595 guidelines for study monitoring by the Board.
- 1596 • The DSMB will meet at least two times annually as determined by the Chairperson.
- 1597 • An emergency meeting of the DSMB may be called at any time by the Chair or by the NIH should
- 1598 participant safety questions or other unanticipated problems arise.
- 1599 • Meetings shall be closed to the public because discussions may address confidential participant
- 1600 data.
- 1601 • Meetings are attended by the Principal Investigators and members of their staff.
- 1602 • Meetings may be convened as conference or videoconference calls as well as in-person.

1603 **3. Trial Safety**

1604 *Description of any specific events that would preclude a participant from continuing the intervention*

1605 Death of a participant would constitute preclusion from continuing the intervention.

1606

1607 *Description of the potential risks and the measures in place to protect participants against foreseeable*

1608 *risks*

1609 There are minimal risks to participants in this study. The potential risks to study participants include:

- 1610 • Breach of confidentiality and privacy as information about each participant including their health-
- 1611 related information
  - 1612 ○ To protect against this, study team will closely adhere to Penn Medicine IRB protocols and
  - 1613 minimize the risk of breach of data and confidentiality, we will use secure, encrypted servers
  - 1614 to host the data and conduct the analysis.
- 1615 • Participants will also complete mental health surveys and the questions within these assessment
- 1616 tools may be sensitive or emotional for participants.
  - 1617 ○ To mitigate risks of self-harm, all study participants will sign an informed consent explaining
  - 1618 that all Penn Medicine employees have access to Cobalt resources regardless of their
  - 1619 participation in the trial. Study participants will also receive guidance on 24/7 confidential
  - 1620 hotlines and services if they experience thoughts of self-harm.
- 1621 • Individuals known to the participant who view messages or survey responses on the participant's
- 1622 phone.
  - 1623 ○ To protect against this, all participants will be informed of this potential risk and be
  - 1624 educated on how to password protect their device and limit access using the device's
  - 1625 inherent security features.

1626

1627 *Description of the consent/assent procedures (e.g., by whom, how and under*

1628 *what conditions will a subject be consented)*

1629 All study participants will independently read and sign the informed consent document on Way to

1630 Health, a HIPPA compliant platform and receive a pdf of the document after they enroll. The informed

1631 consent process informs the participant of all pertinent aspects of the study, provides contact

Effect of a Digital Engagement Strategy on Healthcare Worker Mental Health and Well-being: A Randomized Controlled Trial

1632 information for the study team should the participant have any questions, and indicates the study is  
1633 voluntary and that the participant has the right to stop at any time. Participants will have access to the  
1634 document at all times for their review.

1635  
1636 *Description of the mechanisms in place to protect subject privacy (e.g., interviews will take place in a*  
1637 *private room, whether results of testing data will be shared with participant's legally authorized*  
1638 *representative, privacy for minors, secure means of communication between investigators and*  
1639 *participant, e.g., telephone, web portal)*

1640 Mechanisms to protect subject privacy include:

- 1641 • To minimize the risk of breach of data and confidentiality, we will use secure, encrypted servers to  
1642 host the data and conduct the analysis.
- 1643 • All portions of the Cobalt Plus data system will be password protected using a standard  
1644 challenge/response system coupled with a user-specific identity system requiring users to log in with  
1645 their personal PIN and password, which are checked before the login is completed.
- 1646 • Once the user is logged in, all activities are stamped with the user's PIN and date-time stamp.  
1647 Knowledge of participant's and email addresses will be limited to staff who need to know that  
1648 information.

1649  
1650 *Description of the trial stopping rules for the study, if any (e.g., increased suicidal ideation, greater than*  
1651 *expected morbidity or mortality rate).*

1652 No anticipated events are applicable to stopping the trial.

1653  
1654 *Description of the plan for management of incidental findings (e.g., a brain tumor or potential structural*  
1655 *abnormality discovered during a scan).*

1656 This study will not have incidental findings. All participants in control and intervention arms who  
1657 complete assessments and are categorized as severe or at immediate risk for self-harm will be  
1658 connected to resources and a mental health professional. No additional participant-level data will be  
1659 collected and thus no other incidental findings will be captured.

1660  
1661 *Description of the process for the disclosure of any conflicts of interest that may potentially challenge*  
1662 *participant safety or bias the data and how the conflict will be managed*

1663 Co-Investigator David Asch reported a conflict of interest, to which this has been disclosed to all study  
1664 team members and noted in the informed consent as, "Please note that there are other factors to  
1665 consider before agreeing to participate such as additional procedures, use of your personal information,  
1666 costs, and other possible risks not discussed here. Penn Medicine Cobalt resources and delivery system  
1667 used as a part of this protocol was developed by inventors at Penn Medicine and if it were to be  
1668 successful, the University of Pennsylvania would benefit financially."

1669  
1670 *Description of the data security in place to protect the confidentiality of the data (e.g., password*  
1671 *protected encrypted electronic records) and any limits to confidentiality (e.g., suicidal ideation, child*  
1672 *abuse)*

1673 Data security practices in place to protect the confidentiality of the data include:

- 1674 • All data will be stored on the Way To Health Platform, a HIPAA compliant platform to research,  
1675 develop and deploy evidence-based patient engagement strategies.
  - 1676 ○ Way to Health uses a role-based access control (RBAC) approach to assure that participant  
1677 confidentially and study integrity is preserved.
  - 1678 ○ Access and visibility is primary governed by the role of the individual accessing the system.

Effect of a Digital Engagement Strategy on Healthcare Worker Mental Health and Well-being: A Randomized Controlled Trial

- 1679 ○ Access is granted by invitation only and can be revoked at any time. All Way to Health
- 1680 servers are managed by Penn Medicine Academic Compute Services (PMACS).
- 1681 ○ All data at-rest is stored on encrypted disks using encryption keys managed by Way to
- 1682 Health. Encrypted disks use AES encryption with a minimum of 256-bit keys, or keys and
- 1683 ciphers of equivalent or higher cryptographic strength.
- 1684 ○ User passwords are never stored in clear text; they are salted and hashed to eliminate data
- 1685 leakage. All data transmission is encrypted end to end using encryption keys managed by
- 1686 Way to Health.
- 1687 ○ Transmission encryption keys use a minimum of 2048-bit RSA keys, or keys and ciphers of
- 1688 equivalent or higher cryptographic strength (e.g., 256-bit AES session keys in the case of
- 1689 IPsec encryption).
- 1690 ○ Data downloads are generally prohibited by policy.
- 1691 ○ Where appropriate, most datasets are blinded of all personally identifiable information
- 1692 when exported for analysis. A limited number of exports including identifiers exist to assist
- 1693 research staff with recruitment tracking and study management efforts.
- 1694 ○ These datasets are only accessible to certain user roles. These user roles are required to
- 1695 sign and adhere to a W2H Security Agreement as described above.
- 1696 ○ To monitor ongoing usage of the system and identify unauthorized usage of the system, all
- 1697 access to the application and the database are logged automatically.
- 1698 ● All participants will be informed that the information they provide will be held in confidence to the
- 1699 extent that the law allows, but that the exception to this confidentiality is any disclosure of potential
- 1700 for immediate harm of themselves or others, such as active suicidal or homicidal ideation or child
- 1701 abuse. The participants will be notified prior to participation that if any of these issues are raised,
- 1702 the researchers will take whatever steps are necessary to protect the subject or others, including
- 1703 bringing risk of harm to the attention of the proper authorities. This applies only to direct verbal or
- 1704 written disclosure by the patient.

1705 **4. Reportable Events**

1706 *Description of the process and timelines (e.g., hours, days) for collecting and reporting Adverse Events*

1707 *(AEs), Serious Adverse Events (SAEs), and Unanticipated Problems Involving Risks to Subjects or Others to*

1708 *appropriate monitoring and regulatory entities (See NIMH Reportable Events Policy for definitions and*

1709 *timeframes)Collection of Serious Adverse Events and Unanticipated Problems*

1710 According to the Penn Manual for Clinical Research, and as defined by the NIMH, serious adverse events

1711 (SAE) are defined by one of the following:

- 1712 ● Death
- 1713 ● Life-threatening experience
- 1714 ● Inpatient hospitalization or prolongation of hospitalization
- 1715 ● Persistent or significant disability/incapacity
- 1716 ● Congenital anomaly/birth defect in the subject's offspring

1717

1718 In this trial, the following event is considered a SAE: death of a study participant.

1719

1720 According to the Penn Manual for Clinical Research, adverse events (AE) are events that:

- 1721 ● Are untoward or unfavorable medical occurrence in a human subject; and
  - 1722 ● Temporally associated with the subject's participation in the research, whether or not considered
  - 1723 related to the subject's participation in the research
- 1724

Effect of a Digital Engagement Strategy on Healthcare Worker Mental Health and Well-being: A Randomized Controlled Trial

1725 In this trial, the following events are considered an AE:

- 1726 • Information that indicates a change to the risks or potential benefits of the research, in terms of
- 1727 severity or frequency.
- 1728 • Breach of confidentiality.
- 1729 • Incarceration of a participant when the research was not previously approved under Subpart C and
- 1730 the investigator believes it is in the best interest of the subject to remain in the study.
- 1731 • Events that require prompt reporting to the sponsor.
- 1732 • Complaint of a participant when the complaint indicates unexpected risks or the complaint cannot
- 1733 be resolved by the research team.
- 1734 • Protocol violation (meaning an accidental or unintentional change to the IRB approved protocol)
- 1735 that placed one or more participants at increased risk, or has the potential to occur again.
- 1736 • Sponsor-imposed suspension

1737

1738 According to the Penn Manual for Clinical Research / Office for Human Research Protections, an

1739 unanticipated problem is any incident, experience, or outcome that meets all of the following criteria:

- 1740 • unexpected;
- 1741 • related or possibly related to participation in the research; and
- 1742 • suggests that the research places subjects or others at a greater risk of harm than was previously
- 1743 known or recognized

1744

1745 Since these are, by definition, unanticipated, it is impossible to state, a priori, what kind of unanticipated

1746 problems we expect in the trial. However, unanticipated problems in the trial might include differential

1747 rates across treatment groups of increased rates of mental health appointments or emotional distress.

1748 The trial will rely on a participant's family or friend to report death and a participant self-report for other

1749 unanticipated problems.

1750

1751 *Specific plan and timeframe for reporting IRB and/or ISM/DSMB actions to the NIMH (e.g., protocol*

1752 *violations, non-compliance, suspensions, terminations)*

1753 We will use the following procedures in the event of an AE, SAE, and protocol violation. In any of these

1754 instances, the research team will alert the PI and site PIs immediately (same business day).

1755 Subsequently, the PI and site PIs will submit a report within 10 working days (with one exception) of

1756 events that meet the definition of an unanticipated problem involving risks to subjects or others. The

1757 exception is if the SAE involved death and indicates that participants or others are at increased risk of

1758 harm, in which case the PI will be required to submit a report to the IRB within three days.

1759 Reports are submitted electronically through IRB's electronic submission system. The IRB staff (in

1760 conjunction with the IRB chair when necessary) will review reports and decide whether the event meets

1761 the definition of an unanticipated problem increasing risks to subjects or others. Events that meet these

1762 criteria will be considered unanticipated problems involving risks to participants or others, will be

1763 reviewed by the convened IRB, and will be reported accordingly.

1764

1765 See below for a flowchart of how the IRB handles these types of violations



## Effect of a Digital Engagement Strategy on Healthcare Worker Mental Health and Well-being: A Randomized Controlled Trial

| Relatedness                               | Expectedness            | Reportable to IRB?                                                                                                                                                                                                                                                                                            | When to Report                                                                          |
|-------------------------------------------|-------------------------|---------------------------------------------------------------------------------------------------------------------------------------------------------------------------------------------------------------------------------------------------------------------------------------------------------------|-----------------------------------------------------------------------------------------|
| Unrelated or Unlikely related             | Expected and Unexpected | NO                                                                                                                                                                                                                                                                                                            | N/A                                                                                     |
| Possibly, Probably, or Definitely related | Expected                | NO                                                                                                                                                                                                                                                                                                            | N/A                                                                                     |
| Possibly related                          | Unexpected              | <p><b>YES* ONLY IF:</b></p> <p>The event suggests that the research places <b>subjects or others</b> at greater risk than was previously known or recognized (i.e., changes to the study conduct are required to mitigate risk and/or participants' willingness to participate may be adversely impacted)</p> | <p>EXPEDITED REPORTING WITHIN 10 bus. days</p> <p>Summarize at continuing review</p>    |
| Probably or Definitely related            | Unexpected              | YES*                                                                                                                                                                                                                                                                                                          | <p>EXPEDITED REPORTING WITHIN 10 bus. days</p> <p>Summarize at continuing review</p>    |
| Probably or Definitely related death      | Unexpected              | YES*                                                                                                                                                                                                                                                                                                          | <p>EXPEDITED REPORTING WITHIN 3 calendar days</p> <p>Summarize at continuing review</p> |

\*Includes serious and non-serious events.

1766  
1767

### 1768 5. Data Management, Analysis, and Quality Assurance:

1769 *Identification of data sources (e.g., questionnaires, medical records, biospecimen collections, audio/video*  
1770 *recordings)*

1771 In this study, we will:

- 1772 • utilize self-reported surveys and audio recordings as our data sources.
- 1773 • collect data from the Cobalt website for fidelity metrics including frequency of hyperlink use, text
- 1774 messages receiving a response, and participants request to stop receiving texts.
- 1775 ○ For the appointments, we will assess how often appointments are fulfilled or cancelled.

1776

1777 *Description of the security measures in place to protect data sources including how the data will be*  
1778 *labeled and stored*

1779 The trial's security measures are below:

- 1780 • All study participants will provide written informed consent to their participation and will be
- 1781 assigned an ID number by which their data will be identified.
- 1782 • The research team will exercise extreme caution with identifiable private information. Patients
- 1783 randomized to the intervention arm will receive text messages from Way to Health.
- 1784 • All participants are instructed and agree by signing the document that they will not disclose
- 1785 personal health information (PHI) on the Way to Health texting platform and only respond to the
- 1786 text message prompts.
- 1787 • All PHI will be stored on Way to Health, a HIPAA compliant research platform stored on Penn
- 1788 Medicine Academic Computing Services (PMACS) will be the hub for the hardware and database
- 1789 infrastructure that will support the project.
- 1790 ○ PMACS requires all users of data or applications on PMACS servers to complete a PMACS-
- 1791 hosted cybersecurity awareness course annually, which stresses federal data security
- 1792 policies under data use agreements with the university. Curriculum includes HIPAA training
- 1793 and covers secure data transfer, passwords, computer security habits and knowledge of
- 1794 what constitutes misuse or inappropriate use of the server.
- 1795 • Password protection is used at the server and web portal levels for all transactions that allow entry
- 1796 and editing of data or provide access to sensitive subject data or administrative privileges.

Effect of a Digital Engagement Strategy on Healthcare Worker Mental Health and Well-being: A Randomized Controlled Trial

- 1797           ○ Additionally, all PHI data will be encrypted and linked to survey data through a study ID  
1798           number, with linkage and de-encryption keys activated only by a user password for which a  
1799           member of the research team has been given permission to access these sensitive data  
1800           (Principal Investigator Dr. Merchant and project staff who are under the direct supervision  
1801           of the PI).
- 1802           • The database management on these servers is built with multiple layers of security and follows best  
1803           practices for securing sensitive data. The main levels of security are fourfold and include machine  
1804           physical security at the IT facility at which the servers are housed, physical server security in the  
1805           highly restricted server containment room, electronic server security (firewalls, passwords,  
1806           encryption) restricting access to the machine, and directory access controls restricting access to  
1807           these particular data.

1808

1809           *Quality assurance measures for subject recruitment, enrollment, enrollment targets, and for the validity*  
1810           *and integrity of the data.*

1811           The study team has undergone trainings on Good Clinical Practice guidance to ensure that the rights,  
1812           safety, and well-being of study subjects are protected and consistent with the principles that have their  
1813           origin in the Declaration of Helsinki. Study participants will complete self-report surveys while usage  
1814           meta-data will be extracted from the Cobalt platform.

1815

1816

**PROTOCOL CHANGES LOG**

Summary of Amendments and Modifications:

Our IRB protocol included two components, Aim 1: randomized controlled trial and Aim 2: qualitative interviews. Aims 1 and 2 were conducted from 2021 – 2023. There were no major amendments to RCT study design. In May 2022, we increased the study sample from 1,250 to 1,275 to account for staff turnover and attrition rates. Most protocol modifications involved minor changes to survey instruments and consent procedures; adding and deleting key personnel to the study team.

| File Name     | Date of Submission | Approval date | Summary                               | Rationale                                                              |
|---------------|--------------------|---------------|---------------------------------------|------------------------------------------------------------------------|
| initial-sub-1 | 4/12/2021          | 5/12/2021     | Original IRB protocol submission      | Initial trial protocol submission                                      |
| Mod-2         | 10/14/2021         | 11/23/2021    | informed consent                      | updated informed consent                                               |
|               |                    |               | grant application                     | submitted NIH grant application                                        |
|               |                    |               | Data Safety and Monitoring Board plan | submitted Data Safety and Monitoring Board plan                        |
|               |                    |               | Recruitment materials                 | Updated recruitment letter                                             |
|               |                    |               | Surveys                               | Modified study surveys                                                 |
| Mod-3         | 12/9/2021          | 12/13/2021    | informed consent                      | updated informed consent                                               |
|               |                    |               | text message intervention             | updated text message intervention                                      |
|               |                    |               | Data Safety and Monitoring Board plan | submitted Data Safety and Monitoring Board plan                        |
|               |                    |               | Recruitment materials                 | Updated recruitment letters, flyers, scripts, and infographics         |
|               |                    |               | Surveys                               | Modified screening survey and study surveys                            |
| Mod-4         | 1/10/2022          | ...           | informed consent                      | updated informed consent                                               |
|               |                    |               | Recruitment materials                 | Updated recruitment letter                                             |
|               |                    |               | Surveys                               | Modified screening survey and study surveys                            |
|               |                    |               | Safety procedures                     | Provided additional scripts and tools for self-harm safety assessments |
| Mod-5         | 3/3/2022           | 3/28/2022     | Revised informed consent document     | Received feedback to strengthen informed consent document              |
|               |                    |               | Revised HSERA application             | Received feedback to clarify HSERA protocol                            |

Effect of a Digital Engagement Strategy on Healthcare Worker Mental Health and Well-being: A Randomized Controlled Trial

|        |           |           |                                                       |                                                                                                 |
|--------|-----------|-----------|-------------------------------------------------------|-------------------------------------------------------------------------------------------------|
| Mod-6  | 4/4/2022  | 4/12/2022 | Revised outreach materials                            | Revised text message answer choices, revised outreach and welcome email                         |
|        |           |           | Edited compensation material                          | Migrated to Virtual Visa ClinCards                                                              |
|        |           |           | Edited month 6 survey                                 | Included multiple answer choices                                                                |
| Mod-7  | 4/22/2022 | 5/3/2022  | Revised outreach materials                            | Edited welcome email                                                                            |
|        |           |           | HSERA protocol                                        | Receive de-identified demographic information from Penn HR                                      |
|        |           |           | Edited month 6 survey                                 | Added clarifying question                                                                       |
| Mod-8  | 5/31/2022 | 6/6/2022  | HSERA protocol                                        | Increased attrition from 25% to 27.5%                                                           |
|        |           |           | Edited month 6 survey                                 | Edited question                                                                                 |
| Mod-9  | 7/11/2022 | 7/13/2022 | HSERA protocol                                        | Updated study personnel                                                                         |
|        |           |           | Edited month 6 survey                                 | Simplified Cobalt use questions                                                                 |
| Mod-10 | 11/7/2022 | 12/8/2022 | Last text message in Aim 1                            | Included safety resources in last study text message to all participants                        |
|        |           |           | Edited month 9 survey                                 | Simplified and revised follow up question about Cobalt use; added question about clinical hours |
|        |           |           | Updated Aim 2: qualitative interview guide            | Updated questions                                                                               |
|        |           |           | Updated Aim 2: qualitative interview informed consent | Updated informed consent to mirror Aim 1                                                        |
|        |           |           | HSERA protocol                                        | Updated design to include new data storage, Aim 2 coding schema                                 |
| Mod-11 | 1/3/2023  | 1/13/2023 | Updated personnel                                     | Added Sarah Beck and Rachel Howell as study personnel                                           |
| Mod-12 | 2/20/2023 | 3/17/2023 | Continuing Review Application                         | Submitted Continuing Review Application to the IRB                                              |
| Mod-13 | 3/18/2023 | 4/4/2023  | Updated Aim 2; Updated personnel                      | Added study personnel; provided clarification on Aim 2 sampling methods                         |

826

1827

Original Statistical Analysis Plan

1828

1829 We will conduct an intent to treat (ITT) analysis. The ITT analysis will include all randomized participants  
1830 in the groups to which they were randomly assigned. Baseline demographic and clinical characteristics  
1831 will be reported as frequency and percent for categorical variables and median and distribution for  
1832 continuous variables. We will compare baseline characteristics between intervention and control arms  
1833 using t-tests for continuous variables and chi-squared tests for categorical variables. The goal of these  
1834 comparisons will be to determine if the two arms are balanced on baseline variables after  
1835 randomization. Our primary analysis will focus on the difference in PHQ-9 and GAD-7 scores at 6 months  
1836 between the two arms. We will estimate and test differences in means between arms using two- sample  
1837 t-tests and generalized linear models that account for baseline measurements of PHQ-9 and GAD-7.  
1838 Missing data will be assessed for patterns and multiple imputation will be used if deemed appropriate.  
1839 Baseline covariates that are found to be imbalanced between arms may be adjusted for in the model if  
1840 they were deemed to be potential confounders a priori to adjust for potential confounding and for  
1841 efficiency gain. We will use all available PHQ-9 and GAD-7 scores on eligible patients from randomization  
1842 through the last observation. A  $p < 0.05$  will be deemed statistically significant but emphasis will be placed  
1843 on point estimates and confidence intervals.

1844

1845 Secondary outcomes of mental healthcare utilization, satisfaction with connection to services, and  
1846 qualitative feedback on mobile engagement will also be modeled using GEE with mean models specified  
1847 based on the distribution of the specific outcome (e.g. Poisson or negative binomial for number of  
1848 mental healthcare visits, logit for binary responses). Potential associations between system-level or  
1849 regional level case burden and PHQ-9 and GAD-7 scores at baseline and over-time will be assessed with  
1850 generalized linear models and GEE.

1851

1852 Exploratory Aim 1: Statistical approach: The statistical approach for studying HTE will be to test for the  
1853 statistical interaction between the intervention and race and separately by gender in the GEE models  
1854 described above. Although our study was not designed specifically to detect HTE, if 20% of our trial  
1855 participants are Black (based on targeted recruitment efforts), our study will achieve 80% power  
1856 (assuming type I error of 0.05) to detect a 1.8 difference in mean GAD-7 scores and a 2.0 difference in  
1857 mean PHQ-9 scores between arms at 6 months. We anticipate that at least 50% of participants will be  
1858 female. Hence, our study is powered to detect a 1.2 difference in mean GAD-7 scores and a 1.3  
1859 difference in mean PHQ-9 scores between arms at 6 months among women.

1860

1861 Aim 2: Power: no power calculation will be performed for this qualitative aim consistent with prior  
1862 qualitative aims we will aim to interview 80 participants from Aim 1 and evaluate themes until  
1863 saturation Analysis: Using thematic analysis, we will analyze HCW interview transcripts to identify  
1864 recurring themes in attitudes and beliefs toward mental health, well-being, and mental health care or  
1865 resources. Interview audio will be transcribed and uploaded into NVivo software (available as a Penn  
1866 resource). In total we plan for up to 80 semi-structured interviews, or until inductive thematic saturation  
1867 is reached in each group meaning no new themes are emerging. Analysis of qualitative, semi-structured  
1868 interviews utilizes a series of systematic steps in transcribing, developing a code for thematic content,  
1869 and subsequent coding of interviews. A modified grounded theory approach will be used to evaluate  
1870 interview transcriptions. Analysis will begin shortly after the first few interviews are completed. An  
1871 emergent, iterative open coding process will be followed and two trained coders from the research  
1872 team will jointly read five transcripts and draft the outline of a codebook. Each coder will then  
1873 independently code five more transcripts and adjust the codebook as needed. We will review the codes,

Effect of a Digital Engagement Strategy on Healthcare Worker Mental Health and Well-being: A  
Randomized Controlled Trial

1874 resolve discrepancies and finalize coding procedures. Following adjudication of any areas of discrepancy,  
1875 the research team coders will be assigned batches of transcripts for independent coding, sharing 25% of  
1876 the transcripts in each batch for ongoing inter-rater agreement assessment. We will review coding for  
1877 interrater reliability, measured by Cohens kappa (0.8), and overall comprehensiveness. If a high kappa is  
1878 not achieved, further double coding and refining of the code will continue. This approach to coding and  
1879 analyzing qualitative data has been widely used. Strategies used to ensure reliability and validity in the  
1880 qualitative data will include a comprehensive audit trail, checks between coders, team debriefing, and  
1881 corroboration of findings across participants.

1882

1883

1884

1885

1886

1887

1888

1889

1890

1891

1892

1893

1894

1895

1896

1897

1898

1899

1900

1901

1902

1903

1904

1905

1906

1907

1908

1909

Effect of a Digital Engagement Strategy on Healthcare Worker Mental Health and Well-being: A  
Randomized Controlled Trial

1910 Amendments to the Statistical Analysis Plan

1911 All amendments to the original SAP were made prior to unblinding of the data analyst and prior to  
1912 access to outcome data. We omitted satisfaction to access to mental health services as a secondary  
1913 outcome analysis since it was underpowered to detect changes over time.

1914

1915

1916

1917

1918

1919

1920

1921

1922

1923

1924

1925

1926

1927

1928

1929

1930

1931

1932

1933

1934

1935

1936

1937

1938

1939

1940

1941

1942

1943

Effect of a Digital Engagement Strategy on Healthcare Worker Mental Health and Well-being: A Randomized Controlled Trial

1944  
1945  
1946  
1947  
1948  
1949  
1950  
1951  
1952  
1953  
1954  
1955  
1956  
1957  
1958  
1959  
1960  
1961  
1962  
1963  
1964  
1965  
1966  
1967  
1968  
1969  
1970  
1971  
1972  
1973  
1974  
1975  
1976  
1977  
1978  
1979  
1980  
1981  
1982  
1983  
1984  
1985  
1986  
1987  
1988  
1989  
1990

Final Statistical Analysis Plan

We will conduct an intent to treat (ITT) analysis. The ITT analysis will include all randomized participants in the groups to which they were randomly assigned. Baseline demographic and clinical characteristics will be reported as frequency and percent for categorical variables and median and distribution for continuous variables. We will compare baseline characteristics between intervention and control arms using t-tests for continuous variables and chi-squared tests for categorical variables. The goal of these comparisons will be to determine if the two arms are balanced on baseline variables after randomization. Our primary analysis will focus on the difference in PHQ-9 and GAD-7 scores at 6 months between the two arms. We will estimate and test differences in means between arms using two-sample t-tests and generalized linear models that account for baseline measurements of PHQ-9 and GAD-7. Missing data will be assessed for patterns and multiple imputation will be used if deemed appropriate. Baseline covariates that are found to be imbalanced between arms may be adjusted for in the model if they were deemed to be potential confounders a priori to adjust for potential confounding and for efficiency gain. We will use all available PHQ-9 and GAD-7 scores on eligible patients from randomization through the last observation. A  $p < 0.05$  will be deemed statistically significant but emphasis will be placed on point estimates and confidence intervals.

Secondary outcomes of mental healthcare utilization, satisfaction with connection to services, and qualitative feedback on mobile engagement will also be modeled using GEE with mean models specified based on the distribution of the specific outcome (e.g. Poisson or negative binomial for number of mental healthcare visits, logit for binary responses). Potential associations between system-level or regional level case burden and PHQ-9 and GAD-7 scores at baseline and over-time will be assessed with generalized linear models and GEE.

Exploratory Aim 1: Statistical approach: The statistical approach for studying HTE will be to test for the statistical interaction between the intervention and race and separately by gender in the GEE models described above. Although our study was not designed specifically to detect HTE, if 20% of our trial participants are Black (based on targeted recruitment efforts), our study will achieve 80% power (assuming type I error of 0.05) to detect a 1.8 difference in mean GAD-7 scores and a 2.0 difference in mean PHQ-9 scores between arms at 6 months. We anticipate that at least 50% of participants will be female. Hence, our study is powered to detect a 1.2 difference in mean GAD-7 scores and a 1.3 difference in mean PHQ-9 scores between arms at 6 months among women.

Aim 2: Power: no power calculation will be performed for this qualitative aim consistent with prior qualitative aims we will aim to interview 80 participants from Aim 1 and evaluate themes until saturation Analysis: Using thematic analysis, we will analyze HCW interview transcripts to identify recurring themes in attitudes and beliefs toward mental health, well-being, and mental health care or resources. Interview audio will be transcribed and uploaded into NVivo software (available as a Penn resource). In total we plan for up to 80 semi-structured interviews, or until inductive thematic saturation is reached in each group meaning no new themes are emerging. Analysis of qualitative, semi-structured interviews utilizes a series of systematic steps in transcribing, developing a code for thematic content, and subsequent coding of interviews. A modified grounded theory approach will be used to evaluate interview transcriptions. Analysis will begin shortly after the first few interviews are completed. An emergent, iterative open coding process will be followed and two trained coders from the research team will jointly read five transcripts and draft the outline of a codebook. Each coder will then independently code five more transcripts and adjust the codebook as needed. We will review the codes,



Effect of a Digital Engagement Strategy on Healthcare Worker Mental Health and Well-being: A Randomized Controlled Trial

1991 resolve discrepancies and finalize coding procedures. Following adjudication of any areas of discrepancy,  
1992 the research team coders will be assigned batches of transcripts for independent coding, sharing 25% of  
1993 the transcripts in each batch for ongoing inter-rater agreement assessment. We will review coding for  
1994 interrater reliability, measured by Cohens kappa (0.8), and overall comprehensiveness. If a high kappa is  
1995 not achieved, further double coding and refining of the code will continue. This approach to coding and  
1996 analyzing qualitative data has been widely used. Strategies used to ensure reliability and validity in the  
1997 qualitative data will include a comprehensive audit trail, checks between coders, team debriefing, and  
1998 corroboration of findings across participants.

1999

2000
