# Supplementary material for: Digital Engagement Strategy and Health Care Worker Mental Health: A Randomized Clinical Trial
Source: PubMed Central journal article supplement (PMC11127125; doi:10.1001/jamanetworkopen.2024.10994), 2024-05-24
Supplement: jamanetwopen-e2410994-s003.pdf [file jamanetwopen-e2410994-s003.pdf]

## Data Sharing Statement

Agarwal. Digital Engagement Strategy and Health Care Worker Mental Health. *JAMA Netw Open*. Published May 24, 2024. doi:10.1001/jamanetworkopen.2024.10994

### Data

**Data available:** Yes

**Data types:** Deidentified participant data

**How to access data:** [anish.agarwal@pennmedicine.upenn.edu](mailto:anish.agarwal@pennmedicine.upenn.edu)

**When available:** With publication

### Supporting Documents

**Document types:** Statistical/analytic code, Informed consent form

**How to access documents:** [anish.agarwal@pennmedicine.upenn.edu](mailto:anish.agarwal@pennmedicine.upenn.edu)

**When available:** With publication

### Additional Information

**Who can access the data:** researchers whose proposed use of the data has been approved

**Types of analyses:** for a specified purpose

**Mechanisms of data availability:** with a signed data access agreement
